# Supplementary material for: Inequalities in reproductive health care use in five West-African countries: A decomposition analysis of the wealth-based gaps
Source: Springer Nature journal article supplement (doi:10.1186/s12939-020-01167-7), 2020-03-27
Supplement: MOESM1 [file 17839006]

## ADDITIONAL FILE 1

**Supplementary Table 1: Logit and decomposition results**

### Logit Regressions for Probability of reproductive health care service use in Burkina Faso

#### Family planning exposure

|                                    |   |           |
|------------------------------------|---|-----------|
| Logistic regression number of obs. | = | 8091.000  |
| LR chi2(26)                        | = | 992.180   |
| Prob > chi2                        | = | 0.000     |
| Log likelihood                     | = | -4935.081 |
| Pseudo R2                          | = | 0.091     |

| Family planning exposure                         | Coef.  | Std. Err. | z      | P>z   | 95% Conf. interval |        |
|--------------------------------------------------|--------|-----------|--------|-------|--------------------|--------|
| Constant                                         | 1.126  | 0.214     | 5.250  | 0.000 | 0.706              | 1.547  |
| Age                                              | 0.017  | 0.006     | 2.700  | 0.007 | 0.005              | 0.030  |
| Children ever born                               | -0.043 | 0.020     | -2.200 | 0.028 | -0.082             | -0.005 |
| 2 <sup>0</sup> / 3 <sup>0</sup> education (ref.) |        |           |        |       |                    |        |
| No education                                     | -1.071 | 0.131     | -8.180 | 0.000 | -1.327             | -0.814 |
| 1 <sup>0</sup> education                         | -0.795 | 0.140     | -5.670 | 0.000 | -1.070             | -0.521 |
| Urban(ref.)                                      |        |           |        |       |                    |        |
| rural                                            | -0.747 | 0.079     | -9.480 | 0.000 | -0.901             | -0.592 |
| Catholic / protestant (ref.)                     |        |           |        |       |                    |        |
| No religion                                      | -0.081 | 0.292     | -0.280 | 0.783 | -0.653             | 0.492  |
| Islam                                            | 0.094  | 0.060     | 1.560  | 0.119 | -0.024             | 0.212  |
| Traditional / Other                              | 0.032  | 0.119     | 0.270  | 0.790 | -0.201             | 0.264  |
| No partner                                       | 0.062  | 0.149     | 0.420  | 0.676 | -0.230             | 0.354  |
| No complication information                      | -0.023 | 0.051     | -0.460 | 0.647 | -0.123             | 0.076  |
| Health facility permit                           | 0.082  | 0.075     | 1.100  | 0.273 | -0.065             | 0.228  |
| Health facility money                            | -0.278 | 0.061     | -4.600 | 0.000 | -0.397             | -0.160 |
| Health facility distance                         | -0.255 | 0.056     | -4.550 | 0.000 | -0.365             | -0.145 |
| Health facility alone                            | 0.039  | 0.081     | 0.480  | 0.633 | -0.120             | 0.197  |
| BoucledeMo-n (ref.)                              |        |           |        |       |                    |        |
| Cascades                                         | 0.942  | 0.134     | 7.050  | 0.000 | 0.680              | 1.204  |
| Centre                                           | 0.783  | 0.116     | 6.740  | 0.000 | 0.555              | 1.011  |
| CentreEst                                        | 0.499  | 0.104     | 4.810  | 0.000 | 0.295              | 0.702  |
| CentreNord                                       | 0.933  | 0.107     | 8.760  | 0.000 | 0.725              | 1.142  |
| CentreOuest                                      | -0.354 | 0.111     | -3.180 | 0.001 | -0.572             | -0.136 |
| CentreSud                                        | 1.201  | 0.130     | 9.250  | 0.000 | 0.946              | 1.455  |
| Est                                              | 1.436  | 0.114     | 12.560 | 0.000 | 1.212              | 1.660  |
| HautsBasins                                      | 1.062  | 0.101     | 10.500 | 0.000 | 0.864              | 1.260  |
| Nord                                             | 0.912  | 0.108     | 8.470  | 0.000 | 0.701              | 1.122  |
| Plateau-Central                                  | 1.689  | 0.135     | 12.540 | 0.000 | 1.425              | 1.953  |
| Sahel                                            | 0.848  | 0.121     | 6.990  | 0.000 | 0.610              | 1.086  |
| SudOuest                                         | 1.222  | 0.167     | 7.330  | 0.000 | 0.895              | 1.548  |

#### Modern contraceptive use

|                                    |   |           |
|------------------------------------|---|-----------|
| Logistic regression number of obs. | = | 8096.000  |
| LR chi2(26)                        | = | 789.350   |
| Prob > chi2                        | = | 0.000     |
| Log likelihood                     | = | -3370.977 |
| Pseudo R2                          | = | 0.105     |

| Modern contraceptive use | Coef.  | Std. Err. | z      | P>z   | 95% Conf. interval |       |
|--------------------------|--------|-----------|--------|-------|--------------------|-------|
| Constant                 | -0.184 | 0.240     | -0.760 | 0.445 | -0.655             | 0.287 |
| Age                      | 0.002  | 0.008     | 0.240  | 0.810 | -0.014             | 0.017 |
| Children ever born       | 0.054  | 0.025     | 2.180  | 0.029 | 0.005              | 0.103 |

|                                      |        |       |         |       |        |        |
|--------------------------------------|--------|-------|---------|-------|--------|--------|
| 2 <sup>0</sup> / 30 education (ref.) |        |       |         |       |        |        |
| No education                         | -1.151 | 0.108 | -10.650 | 0.000 | -1.363 | -0.939 |
| 1 <sup>0</sup> education             | -0.489 | 0.114 | -4.280  | 0.000 | -0.713 | -0.265 |
| Urban(ref.)                          |        |       |         |       |        |        |
| rural                                | -0.630 | 0.084 | -7.470  | 0.000 | -0.796 | -0.465 |
| Catholic / protestant (ref.)         |        |       |         |       |        |        |
| No religion                          | 0.154  | 0.360 | 0.430   | 0.669 | -0.552 | 0.859  |
| Islam                                | -0.283 | 0.072 | -3.920  | 0.000 | -0.424 | -0.141 |
| Traditional / Other                  | -0.997 | 0.198 | -5.030  | 0.000 | -1.386 | -0.608 |
| No partner                           | -0.829 | 0.177 | -4.690  | 0.000 | -1.175 | -0.483 |
| Complication information             | -0.217 | 0.065 | -3.330  | 0.001 | -0.344 | -0.089 |
| Health facility permit               | 0.131  | 0.097 | 1.350   | 0.178 | -0.060 | 0.322  |
| Health facility money                | -0.181 | 0.072 | -2.510  | 0.012 | -0.323 | -0.039 |
| Health facility distance             | -0.160 | 0.077 | -2.080  | 0.037 | -0.310 | -0.010 |
| Health facility alone                | -0.204 | 0.107 | -1.910  | 0.056 | -0.413 | 0.005  |
| BoucledeMo-n (ref)                   |        |       |         |       |        |        |
| Cascades                             | 0.505  | 0.170 | 2.970   | 0.003 | 0.171  | 0.839  |
| Centre                               | 0.437  | 0.136 | 3.200   | 0.001 | 0.170  | 0.704  |
| CentreEst                            | -0.287 | 0.162 | -1.770  | 0.077 | -0.606 | 0.031  |
| CentreNord                           | -0.129 | 0.163 | -0.790  | 0.429 | -0.448 | 0.191  |
| CentreOuest                          | -0.395 | 0.167 | -2.360  | 0.018 | -0.722 | -0.068 |
| CentreSud                            | 0.525  | 0.168 | 3.120   | 0.002 | 0.195  | 0.855  |
| Est                                  | 0.354  | 0.152 | 2.330   | 0.020 | 0.056  | 0.651  |
| HautsBasins                          | 0.954  | 0.126 | 7.570   | 0.000 | 0.707  | 1.201  |
| Nord                                 | 0.112  | 0.158 | 0.710   | 0.480 | -0.198 | 0.421  |
| Plateau-Central                      | 0.069  | 0.181 | 0.380   | 0.703 | -0.287 | 0.425  |
| Sahel                                | 0.098  | 0.184 | 0.530   | 0.594 | -0.263 | 0.459  |
| SudOuest                             | 0.393  | 0.230 | 1.710   | 0.087 | -0.058 | 0.844  |

#### Adequate antenatal visits

|                                    |   |           |
|------------------------------------|---|-----------|
| Logistic regression number of obs. | = | 8089.000  |
| LR chi2(26)                        | = | 531.960   |
| Prob > chi2                        | = | 0.000     |
| Log likelihood                     | = | -5081.497 |
| Pseudo R2                          | = | 0.050     |

| Adequate antenatal visits            | Coef.  | Std. Err. | z      | P>z   | 95% Conf. interval |        |
|--------------------------------------|--------|-----------|--------|-------|--------------------|--------|
| Constant                             | 0.001  | 0.192     | 0.000  | 0.998 | -0.376             | 0.377  |
| Age                                  | 0.013  | 0.006     | 2.070  | 0.039 | 0.001              | 0.025  |
| Children ever born                   | -0.066 | 0.019     | -3.390 | 0.001 | -0.104             | -0.028 |
| 2 <sup>0</sup> / 30 education (ref.) |        |           |        |       |                    |        |
| No education                         | -0.626 | 0.099     | -6.330 | 0.000 | -0.820             | -0.432 |
| 1 <sup>0</sup> education             | -0.435 | 0.107     | -4.060 | 0.000 | -0.646             | -0.225 |
| Urban(ref.)                          |        |           |        |       |                    |        |
| rural                                | -0.053 | 0.072     | -0.740 | 0.462 | -0.194             | 0.088  |
| Catholic / protestant (ref.)         |        |           |        |       |                    |        |
| No religion                          | -0.111 | 0.290     | -0.380 | 0.702 | -0.678             | 0.457  |
| Islam                                | -0.150 | 0.057     | -2.620 | 0.009 | -0.262             | -0.038 |
| Traditional / Other                  | -0.399 | 0.123     | -3.230 | 0.001 | -0.640             | -0.157 |
| No partner                           | -0.239 | 0.133     | -1.790 | 0.073 | -0.500             | 0.023  |
| No complication information          | 0.004  | 0.050     | 0.090  | 0.928 | -0.093             | 0.102  |
| Health facility permit               | 0.237  | 0.073     | 3.260  | 0.001 | 0.094              | 0.379  |
| Health facility money                | -0.075 | 0.058     | -1.280 | 0.199 | -0.189             | 0.039  |
| Health facility distance             | -0.193 | 0.057     | -3.390 | 0.001 | -0.305             | -0.081 |
| Health facility alone                | 0.095  | 0.078     | 1.200  | 0.228 | -0.059             | 0.248  |
| BoucledeMo-n (ref)                   |        |           |        |       |                    |        |
| Cascades                             | -0.062 | 0.135     | -0.460 | 0.646 | -0.326             | 0.202  |
| Centre                               | 0.523  | 0.108     | 4.830  | 0.000 | 0.311              | 0.736  |
| CentreEst                            | 0.893  | 0.104     | 8.580  | 0.000 | 0.689              | 1.097  |
| CentreNord                           | -0.091 | 0.110     | -0.830 | 0.408 | -0.308             | 0.125  |

|                 |        |       |        |       |        |        |
|-----------------|--------|-------|--------|-------|--------|--------|
| CentreOuest     | -0.083 | 0.112 | -0.740 | 0.458 | -0.302 | 0.136  |
| CentreSud       | 0.594  | 0.125 | 4.740  | 0.000 | 0.348  | 0.839  |
| Est             | 0.043  | 0.113 | 0.380  | 0.702 | -0.178 | 0.264  |
| HautsBasins     | -0.165 | 0.101 | -1.640 | 0.102 | -0.363 | 0.033  |
| Nord            | -0.171 | 0.113 | -1.510 | 0.130 | -0.392 | 0.050  |
| Plateau-Central | 0.330  | 0.123 | 2.690  | 0.007 | 0.090  | 0.571  |
| Sahel           | -0.734 | 0.145 | -5.060 | 0.000 | -1.018 | -0.450 |
| SudOuest        | 0.521  | 0.161 | 3.250  | 0.001 | 0.206  | 0.836  |

### Facility-based childbirth

|                                    |   |           |
|------------------------------------|---|-----------|
| Logistic regression number of obs. | = | 8094.000  |
| LR chi2(26)                        | = | 1429.880  |
| Prob > chi2                        | = | 0.000     |
| Log likelihood                     | = | -3410.736 |
| Pseudo R2                          | = | 0.173     |

| Facility-based childbirth            | Coef.  | Std. Err. | z       | P>z   | 95% Conf. interval |        |
|--------------------------------------|--------|-----------|---------|-------|--------------------|--------|
| Constant                             | 4.835  | 0.367     | 13.180  | 0.000 | 4.116              | 5.555  |
| Age                                  | -0.001 | 0.008     | -0.170  | 0.863 | -0.017             | 0.014  |
| Children ever born                   | -0.057 | 0.024     | -2.420  | 0.016 | -0.104             | -0.011 |
| 2 <sup>o</sup> / 30 education (ref.) |        |           |         |       |                    |        |
| No education                         | -1.376 | 0.286     | -4.820  | 0.000 | -1.936             | -0.816 |
| 1 <sup>o</sup> education             | -0.620 | 0.304     | -2.040  | 0.042 | -1.217             | -0.023 |
| Urban(ref.)                          |        |           |         |       |                    |        |
| rural                                | -1.318 | 0.141     | -9.350  | 0.000 | -1.594             | -1.042 |
| Catholic / protestant (ref.)         |        |           |         |       |                    |        |
| No religion                          | 0.391  | 0.381     | 1.030   | 0.305 | -0.356             | 1.137  |
| Islam                                | -0.326 | 0.081     | -4.030  | 0.000 | -0.484             | -0.167 |
| Traditional / Other                  | -0.741 | 0.129     | -5.730  | 0.000 | -0.995             | -0.488 |
| No partner                           | 0.032  | 0.237     | 0.140   | 0.892 | -0.432             | 0.496  |
| No complication information          | -0.441 | 0.063     | -7.030  | 0.000 | -0.565             | -0.318 |
| Health facility permit               | 0.386  | 0.099     | 3.890   | 0.000 | 0.191              | 0.580  |
| Health facility money                | -0.012 | 0.075     | -0.150  | 0.877 | -0.159             | 0.135  |
| Health facility distance             | -0.937 | 0.068     | -13.820 | 0.000 | -1.070             | -0.804 |
| Health facility alone                | 0.064  | 0.102     | 0.630   | 0.529 | -0.135             | 0.263  |
| BoucledeMo-n (ref)                   |        |           |         |       |                    |        |
| Cascades                             | 0.406  | 0.173     | 2.350   | 0.019 | 0.067              | 0.744  |
| Centre                               | 1.659  | 0.270     | 6.140   | 0.000 | 1.130              | 2.189  |
| CentreEst                            | 0.721  | 0.143     | 5.030   | 0.000 | 0.440              | 1.002  |
| CentreNord                           | 0.005  | 0.126     | 0.040   | 0.967 | -0.242             | 0.252  |
| CentreOuest                          | 0.000  | 0.000     | -0.590  | 0.553 | -0.001             | 0.000  |
| CentreSud                            | 1.009  | 0.195     | 5.170   | 0.000 | 0.626              | 1.392  |
| Est                                  | -0.351 | 0.125     | -2.810  | 0.005 | -0.595             | -0.106 |
| HautsBasins                          | 0.013  | 0.124     | 0.100   | 0.919 | -0.230             | 0.255  |
| Nord                                 | -0.139 | 0.123     | -1.130  | 0.260 | -0.380             | 0.103  |
| Plateau-Central                      | 0.638  | 0.163     | 3.920   | 0.000 | 0.319              | 0.957  |
| Sahel                                | -0.833 | 0.132     | -6.300  | 0.000 | -1.092             | -0.574 |
| SudOuest                             | -0.455 | 0.182     | -2.500  | 0.012 | -0.812             | -0.099 |

### C-section

|                                    |   |          |
|------------------------------------|---|----------|
| Logistic regression number of obs. | = | 8040.000 |
| LR chi2(25)                        | = | 227.880  |
| Prob > chi2                        | = | 0.000    |
| Log likelihood                     | = | -878.627 |
| Pseudo R2                          | = | 0.115    |

| C-section                            | Coef.  | Std. Err. | z      | P>z   | 95% Conf. interval |        |
|--------------------------------------|--------|-----------|--------|-------|--------------------|--------|
| Constant                             |        |           |        |       |                    |        |
| Age                                  | 0.046  | 0.017     | 2.740  | 0.006 | 0.013              | 0.079  |
| Children ever born                   | -0.127 | 0.058     | -2.180 | 0.030 | -0.242             | -0.013 |
| 2 <sup>o</sup> / 30 education (ref.) |        |           |        |       |                    |        |
| No education                         | -0.376 | 0.215     | -1.750 | 0.080 | -0.797             | 0.045  |
| 1 <sup>o</sup> education             | -0.118 | 0.222     | -0.530 | 0.596 | -0.553             | 0.318  |
| Urban(ref.)                          |        |           |        |       |                    |        |
| rural                                | -0.996 | 0.198     | -5.040 | 0.000 | -1.383             | -0.608 |
| Catholic / protestant (ref.)         | -0.129 | 0.156     | -0.830 | 0.409 | -0.436             | 0.178  |
| No religion                          | -0.046 | 0.445     | -0.100 | 0.918 | -0.917             | 0.826  |
| Islam                                | -0.778 | 0.395     | -1.970 | 0.049 | -1.552             | -0.003 |
| Traditional / Other                  | -0.409 | 0.152     | -2.680 | 0.007 | -0.708             | -0.110 |
| No partner                           | 0.100  | 0.215     | 0.470  | 0.641 | -0.322             | 0.522  |
| No complication information          | -0.147 | 0.165     | -0.890 | 0.375 | -0.471             | 0.177  |
| Health facility permit               | -0.166 | 0.184     | -0.900 | 0.366 | -0.527             | 0.194  |
| Health facility money                | 0.115  | 0.222     | 0.520  | 0.604 | -0.321             | 0.551  |
| Health facility distance             |        |           |        |       |                    |        |
| Health facility alone                | -0.600 | 0.518     | -1.160 | 0.247 | -1.616             | 0.416  |
| BoucledeMo-n (ref)                   |        |           |        |       |                    |        |
| Cascades                             | 0.574  | 0.293     | 1.960  | 0.050 | -0.001             | 1.150  |
| Centre                               | -0.506 | 0.395     | -1.280 | 0.200 | -1.281             | 0.269  |
| CentreEst                            | -1.354 | 0.593     | -2.280 | 0.022 | -2.516             | -0.192 |
| CentreNord                           | -0.150 | 0.371     | -0.400 | 0.687 | -0.877             | 0.578  |
| CentreOuest                          | 0.252  | 0.388     | 0.650  | 0.515 | -0.508             | 1.012  |
| CentreSud                            | -0.310 | 0.430     | -0.720 | 0.472 | -1.153             | 0.533  |
| Est                                  | 0.080  | 0.309     | 0.260  | 0.795 | -0.525             | 0.686  |
| HautsBasins                          | -0.142 | 0.387     | -0.370 | 0.713 | -0.901             | 0.616  |
| Nord                                 | -0.017 | 0.426     | -0.040 | 0.967 | -0.852             | 0.817  |
| Plateau-Central                      | -1.868 | 1.004     | -1.860 | 0.063 | -3.835             | 0.099  |
| Sahel                                | -0.321 | 0.598     | -0.540 | 0.591 | -1.494             | 0.852  |
| SudOuest                             | -3.217 | 0.524     | -6.140 | 0.000 | -4.244             | -2.190 |

## Logit Regressions for Probability of reproductive health care service use in Niger

### Family planning exposure

|                                    |   |           |
|------------------------------------|---|-----------|
| Logistic regression number of obs. | = | 6430.000  |
| LR chi2(26)                        | = | 1240.550  |
| Prob > chi2                        | = | 0.000     |
| Log likelihood                     | = | -3832.964 |
| Pseudo R2                          | = | 0.139     |

| Family planning exposure             | Coef.  | Std. Err. | z       | P>z   | 95% Conf. interval |        |
|--------------------------------------|--------|-----------|---------|-------|--------------------|--------|
| _cons                                | 1.432  | 0.226     | 6.330   | 0.000 | 0.989              | 1.876  |
| Age                                  | 0.025  | 0.007     | 3.590   | 0.000 | 0.011              | 0.038  |
| Children ever born                   | -0.001 | 0.018     | -0.060  | 0.956 | -0.036             | 0.034  |
| 2 <sup>o</sup> / 30 education (ref.) |        |           |         |       |                    |        |
| No education                         | -0.979 | 0.143     | -6.860  | 0.000 | -1.258             | -0.699 |
| 1 <sup>o</sup> education             | -0.348 | 0.160     | -2.180  | 0.030 | -0.661             | -0.035 |
| Urban(ref.)                          |        |           |         |       |                    |        |
| rural                                | -0.999 | 0.102     | -9.760  | 0.000 | -1.199             | -0.798 |
| Catholic / protestant (ref.)         |        |           |         |       |                    |        |
| No religion                          |        |           |         |       |                    |        |
| Islam                                |        |           |         |       |                    |        |
| Traditional / Other                  |        |           |         |       |                    |        |
| No partner                           | -0.477 | 0.185     | -2.580  | 0.010 | -0.839             | -0.115 |
| No complication information          | -0.842 | 0.060     | -13.960 | 0.000 | -0.960             | -0.724 |
| missing                              | -0.892 | 0.232     | -3.850  | 0.000 | -1.346             | -0.437 |
| don't know                           | -0.979 | 0.092     | -10.600 | 0.000 | -1.160             | -0.798 |
| Health facility permit               | 0.216  | 0.082     | 2.630   | 0.008 | 0.055              | 0.377  |
| Health facility money                | -0.083 | 0.066     | -1.270  | 0.204 | -0.212             | 0.045  |
| Health facility distance             | -0.238 | 0.070     | -3.380  | 0.001 | -0.376             | -0.100 |

|                                        |        |       |        |       |        |        |
|----------------------------------------|--------|-------|--------|-------|--------|--------|
| Health facility alone<br>Niamey (ref.) | 0.362  | 0.075 | 4.840  | 0.000 | 0.215  | 0.508  |
| Agadez                                 | -0.813 | 0.256 | -3.170 | 0.002 | -1.316 | -0.311 |
| Diffa                                  | -1.320 | 0.235 | -5.630 | 0.000 | -1.780 | -0.860 |
| Dosso                                  | -0.398 | 0.164 | -2.430 | 0.015 | -0.719 | -0.077 |
| Maradi                                 | 0.494  | 0.159 | 3.110  | 0.002 | 0.183  | 0.806  |
| Tahoua                                 | -0.261 | 0.155 | -1.680 | 0.093 | -0.565 | 0.043  |
| Tillaberi                              | 1.062  | 0.170 | 6.240  | 0.000 | 0.729  | 1.396  |
| Zinder                                 | -0.133 | 0.158 | -0.840 | 0.403 | -0.443 | 0.178  |

#### Modern contraceptive use

|                                    |   |           |
|------------------------------------|---|-----------|
| Logistic regression number of obs. | = | 6437.000  |
| LR chi2(26)                        | = | 537.330   |
| Prob > chi2                        | = | 0.000     |
| Log likelihood                     | = | -2515.194 |
| Pseudo R2                          | = | 0.097     |

| Modern contraceptive use               | Coef.  | Std. Err. | z      | P>z   | 95% Conf. interval |        |
|----------------------------------------|--------|-----------|--------|-------|--------------------|--------|
| _cons                                  | 0.714  | 0.254     | 2.810  | 0.005 | 0.216              | 1.213  |
| Age                                    | -0.026 | 0.009     | -2.830 | 0.005 | -0.043             | -0.008 |
| Children ever born                     | 0.085  | 0.024     | 3.600  | 0.000 | 0.039              | 0.131  |
| 2 <sup>o</sup> / 30 education (ref.)   |        |           |        |       |                    |        |
| No education                           | -0.937 | 0.131     | -7.140 | 0.000 | -1.194             | -0.679 |
| 1 <sup>o</sup> education               | -0.501 | 0.147     | -3.400 | 0.001 | -0.790             | -0.212 |
| Urban(ref.)                            |        |           |        |       |                    |        |
| rural                                  | -0.928 | 0.110     | -8.430 | 0.000 | -1.144             | -0.713 |
| Catholic / protestant (ref.)           |        |           |        |       |                    |        |
| No religion                            |        |           |        |       |                    |        |
| Islam                                  |        |           |        |       |                    |        |
| Traditional / Other                    |        |           |        |       |                    |        |
| No partner                             | -1.796 | 0.358     | -5.010 | 0.000 | -2.499             | -1.094 |
| No complication information            | -0.021 | 0.078     | -0.270 | 0.785 | -0.174             | 0.132  |
| missing                                | 0.475  | 0.297     | 1.600  | 0.110 | -0.107             | 1.057  |
| don't know                             | -0.715 | 0.162     | -4.400 | 0.000 | -1.034             | -0.397 |
| Health facility permit                 | -0.032 | 0.113     | -0.280 | 0.779 | -0.254             | 0.190  |
| Health facility money                  | 0.073  | 0.085     | 0.860  | 0.389 | -0.093             | 0.240  |
| Health facility distance               | -0.164 | 0.094     | -1.740 | 0.082 | -0.349             | 0.021  |
| Health facility alone<br>Niamey (ref.) | -0.174 | 0.105     | -1.660 | 0.098 | -0.381             | 0.032  |
| Agadez                                 | -0.135 | 0.267     | -0.500 | 0.614 | -0.658             | 0.388  |
| Diffa                                  | -0.219 | 0.250     | -0.880 | 0.380 | -0.709             | 0.270  |
| Dosso                                  | 0.111  | 0.161     | 0.690  | 0.489 | -0.204             | 0.426  |
| Maradi                                 | -0.879 | 0.163     | -5.400 | 0.000 | -1.198             | -0.560 |
| Tahoua                                 | -1.064 | 0.164     | -6.490 | 0.000 | -1.385             | -0.743 |
| Tillaberi                              | -0.237 | 0.169     | -1.400 | 0.161 | -0.568             | 0.095  |
| Zinder                                 | -0.197 | 0.154     | -1.280 | 0.202 | -0.499             | 0.105  |

#### Adequate antenatal visits

|                                    |   |           |
|------------------------------------|---|-----------|
| Logistic regression number of obs. | = | 5640.000  |
| LR chi2(26)                        | = | 272.510   |
| Prob > chi2                        | = | 0.000     |
| Log likelihood                     | = | -3652.991 |
| Pseudo R2                          | = | 0.036     |

| Adequate antenatal visits            | Coef.  | Std. Err. | z      | P>z   | 95% Conf. interval |        |
|--------------------------------------|--------|-----------|--------|-------|--------------------|--------|
| _cons                                | 0.063  | 0.208     | 0.300  | 0.762 | -0.344             | 0.470  |
| Age                                  | 0.023  | 0.007     | 3.330  | 0.001 | 0.009              | 0.037  |
| Children ever born                   | -0.047 | 0.018     | -2.570 | 0.010 | -0.082             | -0.011 |
| 2 <sup>o</sup> / 30 education (ref.) |        |           |        |       |                    |        |
| No education                         | -0.748 | 0.118     | -6.310 | 0.000 | -0.980             | -0.515 |

|                              |        |       |        |       |        |        |
|------------------------------|--------|-------|--------|-------|--------|--------|
| 1 <sup>0</sup> education     | -0.561 | 0.134 | -4.190 | 0.000 | -0.823 | -0.299 |
| Urban(ref.)                  |        |       |        |       |        |        |
| rural                        | -0.154 | 0.093 | -1.660 | 0.098 | -0.337 | 0.028  |
| Catholic / protestant (ref.) |        |       |        |       |        |        |
| No religion                  |        |       |        |       |        |        |
| Islam                        |        |       |        |       |        |        |
| Traditional / Other          |        |       |        |       |        |        |
| No partner                   | 0.128  | 0.181 | 0.710  | 0.479 | -0.227 | 0.484  |
| No complication information  | -0.111 | 0.059 | -1.890 | 0.059 | -0.225 | 0.004  |
| missing                      | -0.195 | 0.226 | -0.860 | 0.389 | -0.638 | 0.248  |
| don't know                   |        |       |        |       |        |        |
| Health facility permit       | 0.090  | 0.084 | 1.080  | 0.281 | -0.074 | 0.254  |
| Health facility money        | -0.068 | 0.067 | -1.010 | 0.312 | -0.198 | 0.063  |
| Health facility distance     | -0.144 | 0.073 | -1.970 | 0.049 | -0.288 | -0.001 |
| Health facility alone        | 0.016  | 0.077 | 0.210  | 0.833 | -0.135 | 0.167  |
| Niamey (ref.)                |        |       |        |       |        |        |
| Agadez                       | -0.017 | 0.246 | -0.070 | 0.946 | -0.499 | 0.465  |
| Diffa                        | -0.246 | 0.226 | -1.090 | 0.276 | -0.688 | 0.197  |
| Dosso                        | -0.348 | 0.147 | -2.360 | 0.018 | -0.637 | -0.059 |
| Maradi                       | 0.461  | 0.139 | 3.310  | 0.001 | 0.188  | 0.734  |
| Tahoua                       | -0.234 | 0.139 | -1.680 | 0.092 | -0.506 | 0.038  |
| Tillaberi                    | -0.601 | 0.152 | -3.970 | 0.000 | -0.899 | -0.304 |
| Zinder                       | 0.262  | 0.140 | 1.870  | 0.062 | -0.013 | 0.536  |

No information on pregnancy complication (Don't know) dropped and 767 obs not used

#### Facility-based childbirth

|                                    |   |           |
|------------------------------------|---|-----------|
| Logistic regression number of obs. | = | 6435.000  |
| LR chi2(26)                        | = | 2077.330  |
| Prob > chi2                        | = | 0.000     |
| Log likelihood                     | = | -3242.137 |
| Pseudo R2                          | = | 0.243     |

| Facility-based childbirth            | Coef.  | Std. Err. | z       | P>z   | 95% Conf. interval |        |
|--------------------------------------|--------|-----------|---------|-------|--------------------|--------|
| _cons                                | 2.764  | 0.266     | 10.390  | 0.000 | 2.243              | 3.285  |
| Age                                  | 0.024  | 0.008     | 3.090   | 0.002 | 0.009              | 0.039  |
| Children ever born                   | -0.097 | 0.020     | -4.820  | 0.000 | -0.137             | -0.058 |
| 2 <sup>0</sup> / 30 education (ref.) |        |           |         |       |                    |        |
| No education                         | -1.057 | 0.154     | -6.880  | 0.000 | -1.358             | -0.756 |
| 1 <sup>0</sup> education             | -0.269 | 0.173     | -1.550  | 0.121 | -0.609             | 0.071  |
| Urban(ref.)                          |        |           |         |       |                    |        |
| rural                                | -2.119 | 0.115     | -18.500 | 0.000 | -2.344             | -1.895 |
| Catholic / protestant (ref.)         |        |           |         |       |                    |        |
| No religion                          |        |           |         |       |                    |        |
| Islam                                |        |           |         |       |                    |        |
| Traditional / Other                  |        |           |         |       |                    |        |
| No partner                           | 0.509  | 0.218     | 2.330   | 0.020 | 0.081              | 0.936  |
| No complication information          | -0.419 | 0.065     | -6.440  | 0.000 | -0.547             | -0.292 |
| missing                              | -0.474 | 0.247     | -1.920  | 0.055 | -0.958             | 0.010  |
| don't know                           | -2.512 | 0.177     | -14.210 | 0.000 | -2.858             | -2.165 |
| Health facility permit               | 0.249  | 0.094     | 2.660   | 0.008 | 0.065              | 0.432  |
| Health facility money                | 0.028  | 0.072     | 0.390   | 0.694 | -0.113             | 0.170  |
| Health facility distance             | -0.625 | 0.080     | -7.840  | 0.000 | -0.782             | -0.469 |
| Health facility alone                | -0.038 | 0.085     | -0.450  | 0.653 | -0.206             | 0.129  |
| Niamey (ref.)                        |        |           |         |       |                    |        |
| Agadez                               | 0.411  | 0.353     | 1.170   | 0.244 | -0.280             | 1.103  |
| Diffa                                | 0.327  | 0.262     | 1.250   | 0.212 | -0.187             | 0.841  |
| Dosso                                | -0.152 | 0.204     | -0.750  | 0.455 | -0.551             | 0.247  |
| Maradi                               | -0.431 | 0.197     | -2.190  | 0.028 | -0.817             | -0.046 |
| Tahoua                               | -0.290 | 0.196     | -1.480  | 0.140 | -0.674             | 0.095  |
| Tillaberi                            | -0.068 | 0.204     | -0.330  | 0.740 | -0.469             | 0.333  |
| Zinder                               | -0.705 | 0.198     | -3.560  | 0.000 | -1.093             | -0.316 |

**C-section**

|                                    |   |          |
|------------------------------------|---|----------|
| Logistic regression number of obs. | = | 6437.000 |
| LR chi2(26)                        | = | 143.180  |
| Prob > chi2                        | = | 0.000    |
| Log likelihood                     | = | -545.454 |
| Pseudo R2                          | = | 0.116    |

| C-section                            | Coef.  | Std. Err. | z      | P>z   | 95% Conf. interval |        |
|--------------------------------------|--------|-----------|--------|-------|--------------------|--------|
| _cons                                | -2.266 | 0.552     | -4.100 | 0.000 | -3.349             | -1.184 |
| Age                                  | 0.028  | 0.021     | 1.340  | 0.182 | -0.013             | 0.068  |
| Children ever born                   | -0.034 | 0.058     | -0.590 | 0.558 | -0.149             | 0.080  |
| 2 <sup>o</sup> / 30 education (ref.) |        |           |        |       |                    |        |
| No education                         | -0.812 | 0.268     | -3.030 | 0.002 | -1.337             | -0.287 |
| 1 <sup>o</sup> education             | -0.535 | 0.299     | -1.790 | 0.074 | -1.122             | 0.051  |
| Urban(ref.)                          |        |           |        |       |                    |        |
| rural                                | -0.766 | 0.284     | -2.700 | 0.007 | -1.322             | -0.210 |
| Catholic / protestant (ref.)         |        |           |        |       |                    |        |
| No religion                          |        |           |        |       |                    |        |
| Islam                                |        |           |        |       |                    |        |
| Traditional / Other                  |        |           |        |       |                    |        |
| No partner                           | 0.068  | 0.452     | 0.150  | 0.881 | -0.818             | 0.953  |
| No complication information          | -0.087 | 0.202     | -0.430 | 0.668 | -0.484             | 0.310  |
| missing                              | 0.813  | 0.535     | 1.520  | 0.128 | -0.235             | 1.861  |
| don't know                           | -0.692 | 0.507     | -1.370 | 0.172 | -1.686             | 0.301  |
| Health facility permit               | 0.469  | 0.278     | 1.690  | 0.092 | -0.076             | 1.014  |
| Health facility money                | -0.556 | 0.231     | -2.400 | 0.016 | -1.009             | -0.102 |
| Health facility distance             | -0.032 | 0.249     | -0.130 | 0.899 | -0.520             | 0.457  |
| Health facility alone                | -0.273 | 0.274     | -0.990 | 0.320 | -0.810             | 0.265  |
| Niamey (ref.)                        |        |           |        |       |                    |        |
| Agadez                               | -0.774 | 0.598     | -1.300 | 0.195 | -1.945             | 0.397  |
| Diffa                                | -1.838 | 1.038     | -1.770 | 0.077 | -3.873             | 0.196  |
| Dosso                                | -1.033 | 0.399     | -2.590 | 0.010 | -1.815             | -0.250 |
| Maradi                               | -1.117 | 0.373     | -2.990 | 0.003 | -1.849             | -0.385 |
| Tahoua                               | -0.765 | 0.329     | -2.330 | 0.020 | -1.410             | -0.121 |
| Tillaberi                            | -0.821 | 0.397     | -2.070 | 0.038 | -1.599             | -0.044 |
| Zinder                               | -1.416 | 0.399     | -3.540 | 0.000 | -2.199             | -0.633 |

**Logit Regressions for Probability of reproductive health care service use in Nigeria****Family planning exposure**

|                                    |   |           |
|------------------------------------|---|-----------|
| Logistic regression number of obs. | = | 15541.000 |
| LR chi2(21)                        | = | 4043.480  |
| Prob > chi2                        | = | 0.000     |
| Log likelihood                     | = | -8429.620 |
| Pseudo R2                          | = | 0.193     |

| Family planning exposure             | Coef.  | Std. Err. | z       | P>z   | 95% Conf. interval |        |
|--------------------------------------|--------|-----------|---------|-------|--------------------|--------|
| _cons                                | 0.768  | 0.115     | 6.690   | 0.000 | 0.543              | 0.994  |
| Age                                  | 0.028  | 0.004     | 6.800   | 0.000 | 0.020              | 0.035  |
| Children ever born                   | -0.023 | 0.012     | -1.910  | 0.056 | -0.046             | 0.001  |
| 2 <sup>o</sup> / 30 education (ref.) |        |           |         |       |                    |        |
| No education                         | -1.269 | 0.059     | -21.410 | 0.000 | -1.385             | -1.153 |
| 1 <sup>o</sup> education             | -0.607 | 0.050     | -12.070 | 0.000 | -0.706             | -0.509 |
| Urban(ref.)                          |        |           |         |       |                    |        |
| rural                                | -0.610 | 0.041     | -14.800 | 0.000 | -0.691             | -0.529 |
| Catholic / protestant (ref.)         |        |           |         |       |                    |        |
| Islam                                | 0.233  | 0.056     | 4.140   | 0.000 | 0.123              | 0.343  |
| Traditional / Other                  | -1.161 | 0.286     | -4.050  | 0.000 | -1.722             | -0.599 |
| No partner                           | -0.201 | 0.078     | -2.600  | 0.009 | -0.353             | -0.049 |
| No complication information          | -0.725 | 0.048     | -14.970 | 0.000 | -0.819             | -0.630 |
| Don't know                           | -0.679 | 0.172     | -3.950  | 0.000 | -1.016             | -0.343 |

|                          |        |       |         |       |        |        |
|--------------------------|--------|-------|---------|-------|--------|--------|
| <i>missing</i>           | -0.950 | 0.058 | -16.250 | 0.000 | -1.064 | -0.835 |
| Health facility permit   | -0.055 | 0.076 | -0.730  | 0.466 | -0.204 | 0.094  |
| Health facility money    | -0.154 | 0.045 | -3.410  | 0.001 | -0.243 | -0.066 |
| Health facility distance | -0.035 | 0.054 | -0.650  | 0.517 | -0.140 | 0.070  |
| Health facility alone    | 0.069  | 0.076 | 0.900   | 0.366 | -0.080 | 0.218  |
| Health facility attitude | 0.306  | 0.062 | 4.940   | 0.000 | 0.184  | 0.427  |
| South West (ref.)        |        |       |         |       |        |        |
| North Central            | -1.282 | 0.068 | -18.800 | 0.000 | -1.415 | -1.148 |
| North East               | -1.267 | 0.079 | -16.090 | 0.000 | -1.421 | -1.113 |
| North West               | -0.676 | 0.068 | -9.930  | 0.000 | -0.809 | -0.542 |
| South East               | -1.052 | 0.073 | -14.430 | 0.000 | -1.195 | -0.910 |
| South South              | -0.779 | 0.070 | -11.080 | 0.000 | -0.917 | -0.641 |

### Modern contraceptive use

|                                    |   |           |
|------------------------------------|---|-----------|
| Logistic regression number of obs. | = | 15590     |
| LR chi2(21)                        | = | 1738.580  |
| Prob > chi2                        | = | 0.000     |
| Log likelihood                     | = | -5164.410 |
| Pseudo R2                          | = | 0.144     |

| Modern contraceptive use             | Coef.  | Std. Err. | z       | P>z   | 95% Conf. interval |        |
|--------------------------------------|--------|-----------|---------|-------|--------------------|--------|
| _cons                                | -1.075 | 0.149     | -7.210  | 0.000 | -1.367             | -0.783 |
| Age                                  | 0.008  | 0.005     | 1.490   | 0.137 | -0.003             | 0.018  |
| Children ever born                   | 0.097  | 0.016     | 5.930   | 0.000 | 0.065              | 0.130  |
| 2 <sup>0</sup> / 30 education (ref.) |        |           |         |       |                    |        |
| No education                         | -1.529 | 0.104     | -14.680 | 0.000 | -1.734             | -1.325 |
| 1 <sup>0</sup> education             | -0.346 | 0.064     | -5.380  | 0.000 | -0.472             | -0.220 |
| Urban(ref.)                          |        |           |         |       |                    |        |
| rural                                | -0.380 | 0.059     | -6.460  | 0.000 | -0.496             | -0.265 |
| Catholic / protestant (ref.)         |        |           |         |       |                    |        |
| Islam                                | -0.654 | 0.067     | -9.700  | 0.000 | -0.786             | -0.522 |
| Traditional / Other                  | -0.655 | 0.361     | -1.810  | 0.070 | -1.362             | 0.053  |
| No partner                           | 0.035  | 0.100     | 0.350   | 0.728 | -0.161             | 0.231  |
| No complication information          | -0.099 | 0.068     | -1.460  | 0.144 | -0.231             | 0.034  |
| <i>Don't know</i>                    | -0.688 | 0.298     | -2.310  | 0.021 | -1.273             | -0.103 |
| <i>missing</i>                       | -0.702 | 0.101     | -6.930  | 0.000 | -0.900             | -0.503 |
| Health facility permit               | -0.415 | 0.135     | -3.070  | 0.002 | -0.680             | -0.150 |
| Health facility money                | 0.036  | 0.061     | 0.590   | 0.557 | -0.083             | 0.155  |
| Health facility distance             | -0.139 | 0.078     | -1.770  | 0.077 | -0.293             | 0.015  |
| Health facility alone                | -0.228 | 0.121     | -1.880  | 0.060 | -0.466             | 0.009  |
| Health facility attitude             | 0.193  | 0.085     | 2.260   | 0.024 | 0.026              | 0.360  |
| South West (ref.)                    |        |           |         |       |                    |        |
| North Central                        | -0.160 | 0.079     | -2.020  | 0.044 | -0.315             | -0.004 |
| North East                           | -1.201 | 0.129     | -9.310  | 0.000 | -1.454             | -0.948 |
| North West                           | -0.615 | 0.090     | -6.820  | 0.000 | -0.792             | -0.438 |
| South East                           | -1.125 | 0.092     | -12.240 | 0.000 | -1.305             | -0.945 |
| South South                          | -0.412 | 0.080     | -5.160  | 0.000 | -0.568             | -0.255 |

### Adequate antenatal visits

|                                    |   |           |
|------------------------------------|---|-----------|
| Logistic regression number of obs. | = | 11433.000 |
| LR chi2(20)                        | = | 1261.170  |
| Prob > chi2                        | = | 0.000     |
| Log likelihood                     | = | -4550.815 |
| Pseudo R2                          | = | 0.122     |

| Adequate antenatal visits            | Coef.  | Std. Err. | z      | P>z   | 95% Conf. interval |        |
|--------------------------------------|--------|-----------|--------|-------|--------------------|--------|
| _cons                                | 2.567  | 0.183     | 14.030 | 0.000 | 2.208              | 2.925  |
| Age                                  | 0.039  | 0.006     | 6.460  | 0.000 | 0.027              | 0.051  |
| Children ever born                   | -0.081 | 0.017     | -4.700 | 0.000 | -0.114             | -0.047 |
| 2 <sup>0</sup> / 30 education (ref.) |        |           |        |       |                    |        |
| No education                         | -0.554 | 0.077     | -7.160 | 0.000 | -0.705             | -0.402 |



|                              |        |       |         |       |        |        |
|------------------------------|--------|-------|---------|-------|--------|--------|
| 1 <sup>o</sup> education     | -0.434 | 0.074 | -5.880  | 0.000 | -0.578 | -0.289 |
| Urban(ref.)                  |        |       |         |       |        |        |
| rural                        | -0.153 | 0.059 | -2.610  | 0.009 | -0.269 | -0.038 |
| Catholic / protestant (ref.) |        |       |         |       |        |        |
| Islam                        | 0.022  | 0.078 | 0.280   | 0.783 | -0.132 | 0.175  |
| Traditional / Other          | 0.090  | 0.357 | 0.250   | 0.802 | -0.610 | 0.789  |
| No partner                   | -0.054 | 0.116 | -0.470  | 0.639 | -0.281 | 0.172  |
| No complication information  | -0.438 | 0.056 | -7.790  | 0.000 | -0.548 | -0.328 |
| <i>Don't know</i>            | -0.259 | 0.210 | -1.230  | 0.218 | -0.670 | 0.153  |
| <i>missing</i>               |        |       |         |       |        |        |
| Health facility permit       | -0.046 | 0.106 | -0.440  | 0.663 | -0.255 | 0.162  |
| Health facility money        | -0.211 | 0.063 | -3.370  | 0.001 | -0.334 | -0.088 |
| Health facility distance     | -0.430 | 0.070 | -6.170  | 0.000 | -0.567 | -0.294 |
| Health facility alone        | 0.164  | 0.108 | 1.520   | 0.128 | -0.047 | 0.376  |
| Health facility attitude     | 0.059  | 0.088 | 0.670   | 0.503 | -0.113 | 0.231  |
| South West (ref.)            |        |       |         |       |        |        |
| North Central                | -1.301 | 0.117 | -11.160 | 0.000 | -1.529 | -1.072 |
| North East                   | -1.585 | 0.121 | -13.050 | 0.000 | -1.823 | -1.347 |
| North West                   | -1.653 | 0.115 | -14.380 | 0.000 | -1.878 | -1.428 |
| South East                   | -0.407 | 0.141 | -2.880  | 0.004 | -0.684 | -0.130 |
| South South                  | -0.866 | 0.132 | -6.550  | 0.000 | -1.125 | -0.607 |

No information on pregnancy complication (missing) dropped and 3681 obs not used

#### Facility-based childbirth

|                                    |   |           |
|------------------------------------|---|-----------|
| Logistic regression number of obs. | = | 15569.000 |
| LR chi2(26)                        | = | 7299.610  |
| Prob > chi2                        | = | 0.000     |
| Log likelihood                     | = | -7112.824 |
| Pseudo R2                          | = | 0.339     |

| Facility-based childbirth            | Coef.  | Std. Err. | z       | P>z   | 95% Conf. interval |        |
|--------------------------------------|--------|-----------|---------|-------|--------------------|--------|
| _cons                                | 1.416  | 0.128     | 11.090  | 0.000 | 1.166              | 1.667  |
| Age                                  | 0.040  | 0.005     | 8.810   | 0.000 | 0.031              | 0.049  |
| Children ever born                   | -0.137 | 0.014     | -10.060 | 0.000 | -0.164             | -0.110 |
| 2 <sup>o</sup> / 30 education (ref.) |        |           |         |       |                    |        |
| No education                         | -0.999 | 0.060     | -16.550 | 0.000 | -1.117             | -0.881 |
| 1 <sup>o</sup> education             | -0.586 | 0.053     | -10.990 | 0.000 | -0.691             | -0.482 |
| Urban(ref.)                          |        |           |         |       |                    |        |
| rural                                | -0.576 | 0.046     | -12.600 | 0.000 | -0.665             | -0.486 |
| Catholic / protestant (ref.)         |        |           |         |       |                    |        |
| Islam                                | -0.436 | 0.057     | -7.640  | 0.000 | -0.548             | -0.324 |
| Traditional / Other                  | -0.358 | 0.237     | -1.510  | 0.131 | -0.823             | 0.106  |
| No partner                           | -0.243 | 0.084     | -2.900  | 0.004 | -0.408             | -0.079 |
| No complication information          | -0.402 | 0.049     | -8.240  | 0.000 | -0.498             | -0.306 |
| <i>Don't know</i>                    | -0.625 | 0.169     | -3.710  | 0.000 | -0.956             | -0.295 |
| <i>missing</i>                       | -2.219 | 0.076     | -29.050 | 0.000 | -2.369             | -2.069 |
| Health facility permit               | -0.062 | 0.091     | -0.690  | 0.492 | -0.240             | 0.115  |
| Health facility money                | -0.239 | 0.049     | -4.850  | 0.000 | -0.336             | -0.143 |
| Health facility distance             | -0.244 | 0.059     | -4.160  | 0.000 | -0.360             | -0.129 |
| Health facility alone                | -0.079 | 0.088     | -0.900  | 0.367 | -0.252             | 0.093  |
| Health facility attitude             | 0.198  | 0.070     | 2.820   | 0.005 | 0.060              | 0.336  |
| South West (ref.)                    |        |           |         |       |                    |        |
| North Central                        | -0.157 | 0.072     | -2.180  | 0.030 | -0.299             | -0.016 |
| North East                           | -0.868 | 0.080     | -10.880 | 0.000 | -1.024             | -0.711 |
| North West                           | -1.330 | 0.072     | -18.460 | 0.000 | -1.471             | -1.189 |
| South East                           | 0.307  | 0.090     | 3.430   | 0.001 | 0.132              | 0.483  |
| South South                          | -0.800 | 0.077     | -10.450 | 0.000 | -0.950             | -0.650 |

#### C-section

|                                    |   |           |
|------------------------------------|---|-----------|
| Logistic regression number of obs. | = | 15590.000 |
|------------------------------------|---|-----------|

LR chi2(26) = 524.010  
 Prob > chi2 = 0.000  
 Log likelihood = -1798.503  
 Pseudo R2 = 0.127

| C-section                            | Coef.  | Std. Err. | z       | P>z   | 95% Conf. interval |        |
|--------------------------------------|--------|-----------|---------|-------|--------------------|--------|
| _cons                                | -4.090 | 0.279     | -14.650 | 0.000 | -4.637             | -3.543 |
| Age                                  | 0.080  | 0.009     | 8.510   | 0.000 | 0.062              | 0.099  |
| Children ever born                   | -0.294 | 0.035     | -8.420  | 0.000 | -0.363             | -0.226 |
| 2 <sup>0</sup> / 30 education (ref.) |        |           |         |       |                    |        |
| No education                         | -0.669 | 0.206     | -3.250  | 0.001 | -1.072             | -0.265 |
| 1 <sup>0</sup> education             | -0.343 | 0.142     | -2.410  | 0.016 | -0.621             | -0.064 |
| Urban(ref.)                          |        |           |         |       |                    |        |
| rural                                | -0.537 | 0.118     | -4.560  | 0.000 | -0.767             | -0.306 |
| Catholic / protestant (ref.)         |        |           |         |       |                    |        |
| Islam                                | -0.485 | 0.139     | -3.480  | 0.001 | -0.758             | -0.211 |
| Traditional / Other                  | 0.607  | 0.514     | 1.180   | 0.237 | -0.399             | 1.614  |
| No partner                           | -0.028 | 0.190     | -0.150  | 0.882 | -0.401             | 0.345  |
| No complication information          | -0.606 | 0.149     | -4.060  | 0.000 | -0.899             | -0.313 |
| <i>Don't know</i>                    | -2.058 | 1.159     | -1.780  | 0.076 | -4.331             | 0.214  |
| <i>missing</i>                       | -0.992 | 0.248     | -4.010  | 0.000 | -1.478             | -0.507 |
| Health facility permit               | 0.082  | 0.257     | 0.320   | 0.749 | -0.421             | 0.585  |
| Health facility money                | -0.320 | 0.125     | -2.560  | 0.011 | -0.566             | -0.075 |
| Health facility distance             | -0.046 | 0.164     | -0.280  | 0.780 | -0.368             | 0.276  |
| Health facility alone                | -0.252 | 0.257     | -0.980  | 0.328 | -0.755             | 0.252  |
| Health facility attitude             | 0.148  | 0.167     | 0.880   | 0.376 | -0.180             | 0.476  |
| South West (ref.)                    |        |           |         |       |                    |        |
| North Central                        | 0.270  | 0.156     | 1.720   | 0.085 | -0.037             | 0.576  |
| North East                           | 0.304  | 0.214     | 1.420   | 0.156 | -0.116             | 0.723  |
| North West                           | -0.346 | 0.206     | -1.680  | 0.093 | -0.750             | 0.058  |
| South East                           | 0.093  | 0.157     | 0.590   | 0.555 | -0.215             | 0.400  |
| South South                          | 0.324  | 0.150     | 2.160   | 0.030 | 0.031              | 0.617  |

## Logit Regressions for Probability of reproductive health care service use in Ghana

### Family planning exposure

Logistic regression number of obs. = 3200  
 LR chi2(26) = 304.590  
 Prob > chi2 = 0.000  
 Log likelihood = -1700.016  
 Pseudo R2 = 0.082

| Family planning exposure             | Coef.  | Std. Err. | z      | P>z   | 95% Conf. interval |        |
|--------------------------------------|--------|-----------|--------|-------|--------------------|--------|
| cons                                 | 0.908  | 0.251     | 3.620  | 0.000 | 0.417              | 1.400  |
| Age                                  | 0.022  | 0.009     | 2.490  | 0.013 | 0.005              | 0.039  |
| Children ever born                   | -0.060 | 0.033     | -1.830 | 0.067 | -0.125             | 0.004  |
| 2 <sup>0</sup> / 30 education (ref.) |        |           |        |       |                    |        |
| No education                         | -0.736 | 0.128     | -5.740 | 0.000 | -0.988             | -0.485 |
| 1 <sup>0</sup> education             | -0.446 | 0.112     | -3.970 | 0.000 | -0.666             | -0.226 |
| Urban(ref.)                          |        |           |        |       |                    |        |
| rural                                | -0.035 | 0.095     | -0.370 | 0.711 | -0.220             | 0.150  |
| Catholic / protestant (ref.)         |        |           |        |       |                    |        |
| Islam                                | 0.038  | 0.138     | 0.270  | 0.785 | -0.233             | 0.308  |
| Traditional / Other                  | -0.132 | 0.218     | -0.610 | 0.544 | -0.559             | 0.295  |
| No partner                           | -0.202 | 0.113     | -1.790 | 0.074 | -0.424             | 0.020  |
| No complication information          | -0.221 | 0.116     | -1.910 | 0.056 | -0.448             | 0.006  |
| Health facility permit               | 0.067  | 0.190     | 0.350  | 0.724 | -0.305             | 0.440  |
| Health facility money                | -0.332 | 0.099     | -3.360 | 0.001 | -0.525             | -0.138 |
| Health facility distance             | -0.107 | 0.120     | -0.890 | 0.372 | -0.342             | 0.128  |
| Health facility alone                | 0.023  | 0.145     | 0.160  | 0.875 | -0.261             | 0.307  |
| Uninsured                            | -0.238 | 0.093     | -2.560 | 0.010 | -0.419             | -0.056 |
| Ashanti (ref.)                       |        |           |        |       |                    |        |

|               |        |       |        |       |        |        |
|---------------|--------|-------|--------|-------|--------|--------|
| Western       | 0.814  | 0.165 | 4.930  | 0.000 | 0.490  | 1.137  |
| Central       | 0.781  | 0.160 | 4.880  | 0.000 | 0.467  | 1.095  |
| Volta         | 0.517  | 0.188 | 2.740  | 0.006 | 0.148  | 0.887  |
| Eastern       | -0.348 | 0.148 | -2.360 | 0.018 | -0.638 | -0.059 |
| Greater Accra | 0.559  | 0.143 | 3.900  | 0.000 | 0.278  | 0.840  |
| Brong Ahafo   | -0.795 | 0.154 | -5.150 | 0.000 | -1.097 | -0.493 |
| Northern      | -0.017 | 0.235 | -0.070 | 0.943 | -0.478 | 0.445  |
| Upper East    | -0.969 | 0.343 | -2.830 | 0.005 | -1.641 | -0.297 |
| Upper West    | 0.048  | 0.353 | 0.140  | 0.892 | -0.644 | 0.740  |

#### Modern contraceptive use

|                                    |   |           |
|------------------------------------|---|-----------|
| Logistic regression number of obs. | = | 3200      |
| LR chi2(26)                        | = | 105.220   |
| Prob > chi2                        | = | 0.000     |
| Log likelihood                     | = | -1798.573 |
| Pseudo R2                          | = | 0.028     |

| Modern contraceptive use             | Coef.  | Std. Err. | z      | P>z   | 95% Conf. interval |        |
|--------------------------------------|--------|-----------|--------|-------|--------------------|--------|
| cons                                 | -0.756 | 0.249     | -3.030 | 0.002 | -1.245             | -0.267 |
| Age                                  | -0.033 | 0.009     | -3.800 | 0.000 | -0.050             | -0.016 |
| Children ever born                   | 0.145  | 0.032     | 4.550  | 0.000 | 0.082              | 0.207  |
| 2 <sup>o</sup> / 30 education (ref.) |        |           |        |       |                    |        |
| No education                         | -0.310 | 0.136     | -2.280 | 0.023 | -0.576             | -0.044 |
| 1 <sup>o</sup> education             | -0.006 | 0.110     | -0.060 | 0.954 | -0.222             | 0.209  |
| Urban(ref.)                          |        |           |        |       |                    |        |
| rural                                | 0.132  | 0.092     | 1.430  | 0.152 | -0.048             | 0.312  |
| Catholic / protestant (ref.)         |        |           |        |       |                    |        |
| Islam                                | -0.143 | 0.144     | -0.990 | 0.321 | -0.424             | 0.139  |
| Traditional / Other                  | 0.135  | 0.215     | 0.620  | 0.532 | -0.288             | 0.557  |
| No partner                           | -0.069 | 0.112     | -0.620 | 0.535 | -0.289             | 0.150  |
| No complication information          | 0.081  | 0.117     | 0.690  | 0.489 | -0.148             | 0.310  |
| Health facility permit               | 0.065  | 0.192     | 0.340  | 0.735 | -0.311             | 0.441  |
| Health facility money                | -0.090 | 0.098     | -0.910 | 0.361 | -0.282             | 0.103  |
| Health facility distance             | -0.245 | 0.124     | -1.980 | 0.048 | -0.487             | -0.002 |
| Health facility alone                | 0.091  | 0.149     | 0.610  | 0.539 | -0.200             | 0.383  |
| Uninsured                            | 0.244  | 0.090     | 2.720  | 0.006 | 0.068              | 0.419  |
| Ashanti (ref.)                       |        |           |        |       |                    |        |
| Western                              | 0.288  | 0.151     | 1.920  | 0.055 | -0.007             | 0.583  |
| Central                              | 0.486  | 0.144     | 3.380  | 0.001 | 0.204              | 0.768  |
| Volta                                | 0.665  | 0.174     | 3.830  | 0.000 | 0.324              | 1.005  |
| Eastern                              | 0.312  | 0.158     | 1.970  | 0.049 | 0.002              | 0.623  |
| Greater Accra                        | 0.137  | 0.140     | 0.980  | 0.325 | -0.136             | 0.411  |
| Brong Ahafo                          | 0.636  | 0.162     | 3.930  | 0.000 | 0.319              | 0.953  |
| Northern                             | -0.605 | 0.331     | -1.830 | 0.067 | -1.253             | 0.043  |
| Upper East                           | 0.798  | 0.358     | 2.230  | 0.026 | 0.095              | 1.500  |
| Upper West                           | 0.533  | 0.376     | 1.420  | 0.156 | -0.204             | 1.269  |

#### Adequate antenatal visits

|                                    |   |          |
|------------------------------------|---|----------|
| Logistic regression number of obs. | = | 3189     |
| LR chi2(26)                        | = | 215.170  |
| Prob > chi2                        | = | 0.000    |
| Log likelihood                     | = | -758.868 |
| Pseudo R2                          | = | 0.124    |

| Adequate antenatal visits | Coef.  | Std. Err. | z      | P>z   | 95% Conf. interval |        |
|---------------------------|--------|-----------|--------|-------|--------------------|--------|
| cons                      | 2.147  | 0.453     | 4.740  | 0.000 | 1.260              | 3.034  |
| Age                       | 0.098  | 0.016     | 6.180  | 0.000 | 0.067              | 0.130  |
| Children ever born        | -0.258 | 0.055     | -4.660 | 0.000 | -0.366             | -0.149 |

|                                      |        |       |        |       |        |        |
|--------------------------------------|--------|-------|--------|-------|--------|--------|
| 2 <sup>0</sup> / 30 education (ref.) |        |       |        |       |        |        |
| No education                         | -0.509 | 0.207 | -2.460 | 0.014 | -0.914 | -0.103 |
| 1 <sup>0</sup> education             | -0.288 | 0.177 | -1.630 | 0.103 | -0.635 | 0.059  |
| Urban(ref.)                          |        |       |        |       |        |        |
| rural                                | -0.383 | 0.158 | -2.420 | 0.015 | -0.694 | -0.073 |
| Catholic / protestant (ref.)         |        |       |        |       |        |        |
| Islam                                | 0.239  | 0.257 | 0.930  | 0.352 | -0.265 | 0.743  |
| Traditional / Other                  | -0.248 | 0.297 | -0.840 | 0.404 | -0.830 | 0.334  |
| No partner                           | -0.081 | 0.180 | -0.450 | 0.652 | -0.433 | 0.271  |
| No complication information          | -0.696 | 0.172 | -4.050 | 0.000 | -1.033 | -0.359 |
| Health facility permit               | 0.210  | 0.316 | 0.660  | 0.507 | -0.410 | 0.829  |
| Health facility money                | -0.272 | 0.161 | -1.690 | 0.090 | -0.588 | 0.043  |
| Health facility distance             | 0.202  | 0.192 | 1.060  | 0.291 | -0.173 | 0.578  |
| Health facility alone                | -0.647 | 0.211 | -3.060 | 0.002 | -1.061 | -0.233 |
| Uninsured                            | -0.596 | 0.146 | -4.070 | 0.000 | -0.882 | -0.309 |
| Ashanti (ref.)                       |        |       |        |       |        |        |
| Western                              | -0.529 | 0.299 | -1.770 | 0.077 | -1.115 | 0.056  |
| Central                              | -0.552 | 0.290 | -1.900 | 0.057 | -1.121 | 0.018  |
| Volta                                | -1.455 | 0.294 | -4.950 | 0.000 | -2.032 | -0.879 |
| Eastern                              | -1.662 | 0.258 | -6.440 | 0.000 | -2.168 | -1.156 |
| Greater Accra                        | -1.122 | 0.281 | -4.000 | 0.000 | -1.672 | -0.572 |
| Brong Ahafo                          | -0.659 | 0.325 | -2.030 | 0.043 | -1.296 | -0.022 |
| Northern                             | -1.642 | 0.390 | -4.210 | 0.000 | -2.407 | -0.877 |
| Upper East                           | 0.452  | 1.300 | 0.350  | 0.728 | -2.095 | 3.000  |
| Upper West                           | -0.522 | 0.691 | -0.760 | 0.450 | -1.875 | 0.831  |

#### Facility-based childbirth

|                                    |   |           |
|------------------------------------|---|-----------|
| Logistic regression number of obs. | = | 3199      |
| LR chi2(26)                        | = | 532.830   |
| Prob > chi2                        | = | 0.000     |
| Log likelihood                     | = | -1174.789 |
| Pseudo R2                          | = | 0.185     |

| Facility-based childbirth            | Coef.  | Std. Err. | z       | P>z   | 95% Conf. interval |        |
|--------------------------------------|--------|-----------|---------|-------|--------------------|--------|
| cons                                 | 2.434  | 0.329     | 7.390   | 0.000 | 1.789              | 3.080  |
| Age                                  | 0.062  | 0.012     | 5.360   | 0.000 | 0.039              | 0.084  |
| Children ever born                   | -0.275 | 0.041     | -6.790  | 0.000 | -0.354             | -0.196 |
| 2 <sup>0</sup> / 30 education (ref.) |        |           |         |       |                    |        |
| No education                         | -0.746 | 0.151     | -4.930  | 0.000 | -1.043             | -0.449 |
| 1 <sup>0</sup> education             | -0.564 | 0.133     | -4.240  | 0.000 | -0.825             | -0.303 |
| Urban(ref.)                          |        |           |         |       |                    |        |
| rural                                | -1.279 | 0.124     | -10.280 | 0.000 | -1.523             | -1.035 |
| Catholic / protestant (ref.)         |        |           |         |       |                    |        |
| Islam                                | 0.168  | 0.187     | 0.890   | 0.371 | -0.199             | 0.534  |
| Traditional / Other                  | -0.186 | 0.245     | -0.760  | 0.447 | -0.666             | 0.293  |
| No partner                           | -0.024 | 0.142     | -0.170  | 0.864 | -0.302             | 0.254  |
| No complication information          | -0.490 | 0.140     | -3.510  | 0.000 | -0.763             | -0.216 |
| Health facility permit               | -0.168 | 0.230     | -0.730  | 0.464 | -0.618             | 0.282  |
| Health facility money                | 0.190  | 0.124     | 1.530   | 0.125 | -0.053             | 0.433  |
| Health facility distance             | -0.233 | 0.143     | -1.630  | 0.103 | -0.514             | 0.047  |
| Health facility alone                | -0.257 | 0.177     | -1.450  | 0.147 | -0.605             | 0.091  |
| Uninsured                            | -0.399 | 0.113     | -3.540  | 0.000 | -0.620             | -0.178 |
| Ashanti (ref.)                       |        |           |         |       |                    |        |
| Western                              | -0.647 | 0.190     | -3.400  | 0.001 | -1.020             | -0.273 |
| Central                              | -0.866 | 0.182     | -4.760  | 0.000 | -1.223             | -0.509 |
| Volta                                | -0.728 | 0.225     | -3.230  | 0.001 | -1.169             | -0.286 |
| Eastern                              | -0.834 | 0.195     | -4.270  | 0.000 | -1.216             | -0.452 |
| Greater Accra                        | -0.154 | 0.230     | -0.670  | 0.505 | -0.605             | 0.298  |
| Brong Ahafo                          | -0.116 | 0.237     | -0.490  | 0.624 | -0.580             | 0.348  |
| Northern                             | -1.674 | 0.284     | -5.900  | 0.000 | -2.230             | -1.118 |
| Upper East                           | 0.517  | 0.731     | 0.710   | 0.479 | -0.916             | 1.950  |

|            |        |       |        |       |        |       |
|------------|--------|-------|--------|-------|--------|-------|
| Upper West | -0.020 | 0.471 | -0.040 | 0.967 | -0.943 | 0.904 |
|------------|--------|-------|--------|-------|--------|-------|

### C-section

|                                    |   |           |
|------------------------------------|---|-----------|
| Logistic regression number of obs. | = | 3200      |
| LR chi2(26)                        | = | 270.920   |
| Prob > chi2                        | = | 0.000     |
| Log likelihood                     | = | -1281.001 |
| Pseudo R2                          | = | 0.096     |

| C-section                            | Coef.  | Std. Err. | z       | P>z   | 95% Conf. interval |        |
|--------------------------------------|--------|-----------|---------|-------|--------------------|--------|
| cons                                 | -3.748 | 0.309     | -12.130 | 0.000 | -4.353             | -3.142 |
| Age                                  | 0.117  | 0.010     | 11.320  | 0.000 | 0.097              | 0.138  |
| Children ever born                   | -0.362 | 0.042     | -8.610  | 0.000 | -0.444             | -0.280 |
| 2 <sup>o</sup> / 30 education (ref.) |        |           |         |       |                    |        |
| No education                         | -0.597 | 0.189     | -3.170  | 0.002 | -0.967             | -0.228 |
| 1 <sup>o</sup> education             | -0.128 | 0.148     | -0.870  | 0.386 | -0.419             | 0.162  |
| Urban(ref.)                          |        |           |         |       |                    |        |
| rural                                | -0.341 | 0.120     | -2.830  | 0.005 | -0.577             | -0.105 |
| Catholic / protestant (ref.)         |        |           |         |       |                    |        |
| Islam                                | 0.312  | 0.166     | 1.890   | 0.059 | -0.012             | 0.637  |
| Traditional / Other                  | 0.516  | 0.284     | 1.820   | 0.069 | -0.040             | 1.072  |
| No partner                           | -0.052 | 0.144     | -0.360  | 0.719 | -0.335             | 0.231  |
| No complication information          | -0.423 | 0.170     | -2.490  | 0.013 | -0.755             | -0.090 |
| Health facility permit               | -0.765 | 0.293     | -2.610  | 0.009 | -1.340             | -0.190 |
| Health facility money                | -0.087 | 0.125     | -0.690  | 0.488 | -0.333             | 0.159  |
| Health facility distance             | 0.118  | 0.157     | 0.750   | 0.451 | -0.189             | 0.426  |
| Health facility alone                | 0.012  | 0.184     | 0.060   | 0.948 | -0.348             | 0.372  |
| Uninsured                            | -0.112 | 0.115     | -0.980  | 0.329 | -0.337             | 0.113  |
| Ashanti (ref.)                       |        |           |         |       |                    |        |
| Western                              | -0.070 | 0.183     | -0.380  | 0.701 | -0.430             | 0.289  |
| Central                              | 0.011  | 0.178     | 0.060   | 0.949 | -0.337             | 0.360  |
| Volta                                | -0.749 | 0.256     | -2.930  | 0.003 | -1.251             | -0.248 |
| Eastern                              | -0.440 | 0.210     | -2.090  | 0.037 | -0.852             | -0.027 |
| Greater Accra                        | -0.175 | 0.150     | -1.170  | 0.241 | -0.469             | 0.118  |
| Brong Ahafo                          | -0.479 | 0.220     | -2.180  | 0.029 | -0.909             | -0.048 |
| Northern                             | -1.110 | 0.400     | -2.780  | 0.005 | -1.893             | -0.327 |
| Upper East                           | -0.764 | 0.534     | -1.430  | 0.153 | -1.811             | 0.283  |
| Upper West                           | -0.428 | 0.551     | -0.780  | 0.437 | -1.508             | 0.652  |

## Logit Regressions for Probability of reproductive health care service use in Senegal

### Family planning exposure

|                                    |   |           |
|------------------------------------|---|-----------|
| Logistic regression number of obs. | = | 6559      |
| LR chi2(26)                        | = | 546.710   |
| Prob > chi2                        | = | 0.000     |
| Log likelihood                     | = | -4252.716 |
| Pseudo R2                          | = | 0.060     |

| Family planning exposure             | Coef.  | Std. Err. | z      | P>z   | 95% Conf. interval |        |
|--------------------------------------|--------|-----------|--------|-------|--------------------|--------|
| cons                                 | 0.673  | 0.220     | 3.050  | 0.002 | 0.241              | 1.105  |
| Age                                  | 0.026  | 0.006     | 4.720  | 0.000 | 0.015              | 0.037  |
| Children ever born                   | -0.059 | 0.018     | -3.270 | 0.001 | -0.094             | -0.024 |
| 2 <sup>o</sup> / 30 education (ref.) |        |           |        |       |                    |        |
| No education                         | -0.670 | 0.080     | -8.380 | 0.000 | -0.827             | -0.513 |
| 1 <sup>o</sup> education             | -0.239 | 0.083     | -2.870 | 0.004 | -0.403             | -0.076 |
| Urban(ref.)                          |        |           |        |       |                    |        |
| rural                                | -0.218 | 0.064     | -3.380 | 0.001 | -0.344             | -0.092 |
| Catholic / protestant (ref.)         |        |           |        |       |                    |        |
| Islam                                | 0.064  | 0.153     | 0.420  | 0.678 | -0.237             | 0.364  |

|                             |        |       |        |       |        |        |
|-----------------------------|--------|-------|--------|-------|--------|--------|
| Traditional / Other         | -2.793 | 1.364 | -2.050 | 0.041 | -5.466 | -0.119 |
| No partner                  | -0.353 | 0.103 | -3.430 | 0.001 | -0.555 | -0.151 |
| No complication information | -0.317 | 0.056 | -5.680 | 0.000 | -0.427 | -0.208 |
| Dakar (ref.)                |        |       |        |       |        |        |
| Ziguinchor                  | -0.900 | 0.156 | -5.750 | 0.000 | -1.206 | -0.593 |
| Diourbel                    | -0.511 | 0.098 | -5.200 | 0.000 | -0.703 | -0.318 |
| SaintLouis                  | -0.875 | 0.121 | -7.250 | 0.000 | -1.112 | -0.639 |
| Tambacounda                 | -0.798 | 0.172 | -4.650 | 0.000 | -1.135 | -0.462 |
| Kaolack                     | -0.504 | 0.113 | -4.470 | 0.000 | -0.725 | -0.283 |
| This                        | -0.013 | 0.090 | -0.150 | 0.881 | -0.190 | 0.163  |
| Louga                       | -0.789 | 0.123 | -6.410 | 0.000 | -1.030 | -0.548 |
| Fatick                      | -0.612 | 0.134 | -4.570 | 0.000 | -0.875 | -0.350 |
| Kolda                       | -0.640 | 0.168 | -3.810 | 0.000 | -0.968 | -0.311 |
| Matam                       | -1.214 | 0.158 | -7.660 | 0.000 | -1.525 | -0.904 |
| Kaffrine                    | -0.518 | 0.183 | -2.830 | 0.005 | -0.877 | -0.159 |
| Kedougou                    | -1.044 | 0.280 | -3.720 | 0.000 | -1.593 | -0.494 |
| Sedhiou                     | -0.702 | 0.174 | -4.050 | 0.000 | -1.042 | -0.362 |

#### Modern contraceptive use

|                                    |   |           |
|------------------------------------|---|-----------|
| Logistic regression number of obs. | = | 6559      |
| LR chi2(26)                        | = | 539.000   |
| Prob > chi2                        | = | 0.000     |
| Log likelihood                     | = | -3750.525 |
| Pseudo R2                          | = | 0.067     |

| Family planning exposure             | Coef.  | Std. Err. | z      | P>z   | 95% Conf. interval |        |
|--------------------------------------|--------|-----------|--------|-------|--------------------|--------|
| cons                                 | 0.282  | 0.229     | 1.230  | 0.218 | -0.167             | 0.731  |
| Age                                  | -0.005 | 0.006     | -0.920 | 0.358 | -0.017             | 0.006  |
| Children ever born                   | 0.126  | 0.019     | 6.520  | 0.000 | 0.088              | 0.164  |
| 2 <sup>o</sup> / 30 education (ref.) |        |           |        |       |                    |        |
| No education                         | -0.660 | 0.082     | -8.020 | 0.000 | -0.821             | -0.499 |
| 1 <sup>o</sup> education             | -0.105 | 0.082     | -1.280 | 0.202 | -0.265             | 0.056  |
| Urban(ref.)                          |        |           |        |       |                    |        |
| rural                                | -0.424 | 0.071     | -6.020 | 0.000 | -0.562             | -0.286 |
| Catholic / protestant (ref.)         |        |           |        |       |                    |        |
| Islam                                | -0.407 | 0.153     | -2.670 | 0.008 | -0.706             | -0.108 |
| Traditional / Other                  | -0.074 | 0.641     | -0.120 | 0.908 | -1.331             | 1.183  |
| No partner                           | -0.494 | 0.115     | -4.300 | 0.000 | -0.719             | -0.269 |
| No complication information          | -0.152 | 0.060     | -2.530 | 0.011 | -0.269             | -0.034 |
| Dakar (ref.)                         |        |           |        |       |                    |        |
| Ziguinchor                           | -0.536 | 0.168     | -3.200 | 0.001 | -0.865             | -0.208 |
| Diourbel                             | -0.960 | 0.116     | -8.270 | 0.000 | -1.188             | -0.733 |
| SaintLouis                           | 0.007  | 0.123     | 0.060  | 0.956 | -0.233             | 0.247  |
| Tambacounda                          | -0.804 | 0.203     | -3.960 | 0.000 | -1.201             | -0.406 |
| Kaolack                              | -0.524 | 0.122     | -4.280 | 0.000 | -0.764             | -0.284 |
| This                                 | -0.009 | 0.089     | -0.110 | 0.915 | -0.184             | 0.165  |
| Louga                                | -0.123 | 0.130     | -0.940 | 0.346 | -0.378             | 0.132  |
| Fatick                               | -0.346 | 0.144     | -2.400 | 0.017 | -0.629             | -0.063 |
| Kolda                                | -0.812 | 0.197     | -4.110 | 0.000 | -1.199             | -0.425 |
| Matam                                | -0.983 | 0.194     | -5.060 | 0.000 | -1.363             | -0.602 |
| Kaffrine                             | -0.654 | 0.218     | -3.000 | 0.003 | -1.081             | -0.227 |
| Kedougou                             | -0.801 | 0.330     | -2.430 | 0.015 | -1.448             | -0.154 |
| Sedhiou                              | -0.862 | 0.210     | -4.110 | 0.000 | -1.273             | -0.451 |

#### Adequate antenatal visits

|                                    |   |           |
|------------------------------------|---|-----------|
| Logistic regression number of obs. | = | 6390      |
| LR chi2(26)                        | = | 501.040   |
| Prob > chi2                        | = | 0.000     |
| Log likelihood                     | = | -4106.388 |
| Pseudo R2                          | = | 0.058     |

| Adequate antenatal visits            | Coef.  | Std. Err. | z       | P>z   | 95% Conf. interval |        |
|--------------------------------------|--------|-----------|---------|-------|--------------------|--------|
| cons                                 | 0.675  | 0.230     | 2.940   | 0.003 | 0.225              | 1.126  |
| Age                                  | 0.049  | 0.006     | 8.470   | 0.000 | 0.037              | 0.060  |
| Children ever born                   | -0.197 | 0.019     | -10.550 | 0.000 | -0.234             | -0.160 |
| 2 <sup>o</sup> / 30 education (ref.) |        |           |         |       |                    |        |
| No education                         | -0.497 | 0.083     | -6.000  | 0.000 | -0.659             | -0.335 |
| 1 <sup>o</sup> education             | -0.281 | 0.086     | -3.250  | 0.001 | -0.450             | -0.111 |
| Urban(ref.)                          |        |           |         |       |                    |        |
| rural                                | -0.282 | 0.066     | -4.290  | 0.000 | -0.411             | -0.153 |
| Catholic / protestant (ref.)         |        |           |         |       |                    |        |
| Islam                                | -0.170 | 0.163     | -1.050  | 0.296 | -0.489             | 0.149  |
| Traditional / Other                  | -0.139 | 0.598     | -0.230  | 0.816 | -1.311             | 1.032  |
| No partner                           | -0.509 | 0.105     | -4.840  | 0.000 | -0.715             | -0.303 |
| No complication information          | -0.409 | 0.057     | -7.200  | 0.000 | -0.520             | -0.298 |
| Dakar (ref.)                         |        |           |         |       |                    |        |
| Ziguinchor                           | -0.065 | 0.166     | -0.390  | 0.694 | -0.392             | 0.261  |
| Diourbel                             | -0.323 | 0.101     | -3.190  | 0.001 | -0.521             | -0.125 |
| SaintLouis                           | -0.363 | 0.123     | -2.960  | 0.003 | -0.604             | -0.122 |
| Tambacounda                          | 0.013  | 0.177     | 0.070   | 0.944 | -0.335             | 0.360  |
| Kaolack                              | -0.160 | 0.117     | -1.370  | 0.170 | -0.389             | 0.068  |
| This                                 | -0.124 | 0.092     | -1.350  | 0.177 | -0.303             | 0.056  |
| Louga                                | -0.550 | 0.125     | -4.400  | 0.000 | -0.795             | -0.305 |
| Fatick                               | -0.326 | 0.137     | -2.380  | 0.017 | -0.595             | -0.057 |
| Kolda                                | -0.731 | 0.170     | -4.300  | 0.000 | -1.063             | -0.398 |
| Matam                                | -0.676 | 0.154     | -4.390  | 0.000 | -0.978             | -0.374 |
| Kaffrine                             | -0.428 | 0.187     | -2.290  | 0.022 | -0.795             | -0.061 |
| Kedougou                             | -0.360 | 0.276     | -1.300  | 0.192 | -0.901             | 0.181  |
| Sedhiou                              | -0.436 | 0.176     | -2.480  | 0.013 | -0.780             | -0.092 |

#### Facility-based childbirth

|                                    |   |           |
|------------------------------------|---|-----------|
| Logistic regression number of obs. | = | 6559      |
| LR chi2(26)                        | = | 660.110   |
| Prob > chi2                        | = | 0.000     |
| Log likelihood                     | = | -2152.222 |
| Pseudo R2                          | = | 0.133     |

| Facility-based childbirth            | Coef.  | Std. Err. | z      | P>z   | 95% Conf. interval |        |
|--------------------------------------|--------|-----------|--------|-------|--------------------|--------|
| cons                                 | 3.177  | 0.384     | 8.270  | 0.000 | 2.424              | 3.930  |
| Age                                  | 0.044  | 0.009     | 4.840  | 0.000 | 0.026              | 0.062  |
| Children ever born                   | -0.213 | 0.027     | -7.890 | 0.000 | -0.266             | -0.160 |
| 2 <sup>o</sup> / 30 education (ref.) |        |           |        |       |                    |        |
| No education                         | -1.016 | 0.169     | -6.030 | 0.000 | -1.347             | -0.686 |
| 1 <sup>o</sup> education             | -0.476 | 0.182     | -2.620 | 0.009 | -0.833             | -0.120 |
| Urban(ref.)                          |        |           |        |       |                    |        |
| rural                                | -0.905 | 0.108     | -8.350 | 0.000 | -1.117             | -0.692 |
| Catholic / protestant (ref.)         |        |           |        |       |                    |        |
| Islam                                | 0.094  | 0.267     | 0.350  | 0.726 | -0.429             | 0.617  |
| Traditional / Other                  | -0.618 | 0.699     | -0.880 | 0.376 | -1.989             | 0.752  |
| No partner                           | -0.108 | 0.187     | -0.580 | 0.562 | -0.475             | 0.258  |
| No complication information          | -0.464 | 0.087     | -5.330 | 0.000 | -0.635             | -0.294 |
| Dakar (ref.)                         |        |           |        |       |                    |        |
| Ziguinchor                           | -0.142 | 0.293     | -0.490 | 0.627 | -0.718             | 0.433  |
| Diourbel                             | -0.005 | 0.171     | -0.030 | 0.975 | -0.340             | 0.329  |
| SaintLouis                           | -0.188 | 0.205     | -0.920 | 0.359 | -0.589             | 0.214  |
| Tambacounda                          | -1.075 | 0.228     | -4.710 | 0.000 | -1.522             | -0.627 |
| Kaolack                              | -0.462 | 0.186     | -2.480 | 0.013 | -0.827             | -0.097 |
| This                                 | 0.496  | 0.181     | 2.740  | 0.006 | 0.141              | 0.850  |
| Louga                                | -0.184 | 0.199     | -0.920 | 0.356 | -0.574             | 0.207  |
| Fatick                               | -0.199 | 0.215     | -0.930 | 0.355 | -0.620             | 0.222  |
| Kolda                                | -1.561 | 0.219     | -7.130 | 0.000 | -1.990             | -1.131 |
| Matam                                | -0.517 | 0.214     | -2.420 | 0.015 | -0.936             | -0.099 |

|          |        |       |        |       |        |        |
|----------|--------|-------|--------|-------|--------|--------|
| Kaffrine | -0.746 | 0.242 | -3.080 | 0.002 | -1.220 | -0.272 |
| Kedougou | -1.513 | 0.312 | -4.840 | 0.000 | -2.125 | -0.901 |
| Sedhiou  | -1.310 | 0.229 | -5.710 | 0.000 | -1.760 | -0.861 |

### C-section

|                                    |   |           |
|------------------------------------|---|-----------|
| Logistic regression number of obs. | = | 6479      |
| LR chi2(26)                        | = | 218.250   |
| Prob > chi2                        | = | 0.000     |
| Log likelihood                     | = | -1589.791 |
| Pseudo R2                          | = | 0.064     |

| C-section                            | Coef.  | Std. Err. | z      | P>z   | 95% Conf. interval |        |
|--------------------------------------|--------|-----------|--------|-------|--------------------|--------|
| cons                                 | -3.225 | 0.354     | -9.100 | 0.000 | -3.919             | -2.530 |
| Age                                  | 0.081  | 0.009     | 8.600  | 0.000 | 0.062              | 0.099  |
| Children ever born                   | -0.240 | 0.035     | -6.860 | 0.000 | -0.309             | -0.171 |
| 2 <sup>0</sup> / 30 education (ref.) |        |           |        |       |                    |        |
| No education                         | -0.314 | 0.135     | -2.330 | 0.020 | -0.579             | -0.050 |
| 1 <sup>0</sup> education             | -0.306 | 0.136     | -2.250 | 0.025 | -0.573             | -0.039 |
| Urban(ref.)                          |        |           |        |       |                    |        |
| rural                                | -0.273 | 0.129     | -2.110 | 0.035 | -0.526             | -0.020 |
| Catholic / protestant (ref.)         |        |           |        |       |                    |        |
| Islam                                | -0.340 | 0.219     | -1.550 | 0.121 | -0.769             | 0.090  |
| Traditional / Other                  | 0.203  | 0.928     | 0.220  | 0.827 | -1.617             | 2.022  |
| No partner                           | 0.452  | 0.159     | 2.840  | 0.004 | 0.140              | 0.763  |
| No complication information          | -0.512 | 0.103     | -4.960 | 0.000 | -0.715             | -0.310 |
| Dakar (ref.)                         |        |           |        |       |                    |        |
| Ziguinchor                           | -0.489 | 0.274     | -1.790 | 0.074 | -1.026             | 0.048  |
| Diourbel                             | 0.279  | 0.175     | 1.590  | 0.111 | -0.064             | 0.622  |
| SaintLouis                           | 0.110  | 0.207     | 0.530  | 0.596 | -0.296             | 0.515  |
| Tambacounda                          | -0.537 | 0.397     | -1.350 | 0.176 | -1.315             | 0.240  |
| Kaolack                              | -0.543 | 0.239     | -2.270 | 0.023 | -1.011             | -0.074 |
| This                                 | -0.384 | 0.170     | -2.270 | 0.023 | -0.717             | -0.052 |
| Louga                                | 0.076  | 0.225     | 0.340  | 0.736 | -0.365             | 0.517  |
| Fatick                               | -0.646 | 0.315     | -2.050 | 0.040 | -1.263             | -0.029 |
| Kolda                                | -0.627 | 0.385     | -1.630 | 0.104 | -1.382             | 0.129  |
| Matam                                | -0.282 | 0.330     | -0.860 | 0.392 | -0.928             | 0.364  |
| Kaffrine                             | -0.594 | 0.473     | -1.260 | 0.209 | -1.521             | 0.333  |
| Kedougou                             | -0.464 | 0.678     | -0.680 | 0.494 | -1.793             | 0.865  |
| Sedhiou                              | -0.805 | 0.416     | -1.940 | 0.053 | -1.619             | 0.010  |



**Supplementary Table 2: Sensitivity analysis by using the coefficients of the upper three quintiles against the lower two quintiles**

**Burkina Faso**

|                       | Family planning exposure | Modern contraceptive | Antenatal | FBD   | C-Section |
|-----------------------|--------------------------|----------------------|-----------|-------|-----------|
| Obs. N                | 9831                     | 9838                 | 9830      | 9832  | 9838      |
| N of Obs G= <i>lw</i> | 3668                     | 3669                 | 3667      | 3665  | 3669      |
| N of Obs G= <i>hw</i> | 6163                     | 6169                 | 6163      | 6167  | 6169      |
| Pr (low-wealth)       | 0.49                     | 0.09                 | 0.28      | 0.62  | 0.01      |
| Pr (high-wealth)      | 0.64                     | 0.20                 | 0.40      | 0.84  | 0.03      |
| Difference            | -0.15                    | -0.12                | -0.12     | -0.22 | -0.02     |
| Total explained       | -0.06                    | -0.07                | -0.08     | -0.14 | -0.02     |
| % explained           | 42%                      | 60%                  | 70%       | 62%   | 94%       |

*Variable contribution*

|                             | Family planning exposure | Modern contraceptive | Antenatal          | FBD                | C-Section          |
|-----------------------------|--------------------------|----------------------|--------------------|--------------------|--------------------|
| Age                         | 0.00*<br>(0.00)          | 0.00<br>(0.00)       | 0.00*<br>(0.00)    | -0.00<br>(0.00)    | 0.00<br>(0.00)     |
| Children ever born          | -0.01<br>(0.00)          | 0.00<br>(0.00)       | -0.02***<br>(0.00) | -0.01*<br>(0.00)   | -0.00<br>(0.00)    |
| No education                | -0.03***<br>(0.00)       | -0.04***<br>(0.00)   | -0.03***<br>(0.00) | -0.02***<br>(0.01) | -0.00<br>(0.00)    |
| 1 <sup>0</sup> education    | 0.01***<br>(0.00)        | 0.01***<br>(0.00)    | 0.01***<br>(0.00)  | 0.01<br>(0.01)     | 0.00<br>(0.00)     |
| Rural                       | -0.04***<br>(0.00)       | -0.03***<br>(0.00)   | -0.00<br>(0.00)    | -0.02***<br>(0.00) | -0.01***<br>(0.00) |
| No religion                 | -0.00<br>(0.00)          | 0.00<br>(0.00)       | -0.00<br>(0.00)    | 0.00<br>(0.00)     | 0.00<br>(.)        |
| Islam                       |                          |                      |                    |                    |                    |
| Animist                     | -0.00<br>(0.00)          | 0.00***<br>(0.00)    | 0.00*<br>(0.00)    | 0.01**<br>(0.00)   | 0.00<br>(0.00)     |
| Traditional / Other         | -0.00<br>(0.00)          | -0.01***<br>(0.00)   | -0.01**<br>(0.00)  | -0.02***<br>(0.00) | -0.00<br>(0.00)    |
| No partner                  | -0.00<br>(0.00)          | 0.00***<br>(0.00)    | 0.00*<br>(0.00)    | -0.00<br>(0.00)    | 0.00<br>(0.00)     |
| No Complication information | -0.00<br>(0.00)          | -0.00**<br>(0.00)    | -0.00<br>(0.00)    | -0.01***<br>(0.00) | 0.00<br>(0.00)     |
| Health facility permit      | -0.00*<br>(0.00)         | -0.00<br>(0.00)      | -0.00**<br>(0.00)  | -0.00**<br>(0.00)  | 0.00<br>(0.00)     |
| Health facility money       | -0.01***<br>(0.00)       | -0.00*<br>(0.00)     | -0.00<br>(0.00)    | -0.00<br>(0.00)    | -0.00<br>(0.00)    |
| Health facility distance    | -0.01***<br>(0.00)       | -0.00<br>(0.00)      | -0.00*<br>(0.00)   | -0.02***<br>(0.00) | -0.00<br>(0.00)    |

|                       |                    |                    |                    |                    |                 |
|-----------------------|--------------------|--------------------|--------------------|--------------------|-----------------|
| Health facility alone | -0.00<br>(0.00)    | -0.00<br>(0.00)    | -0.00<br>(0.00)    | -0.00<br>(0.00)    | 0.00<br>(0.00)  |
| Cascades              | -0.01***<br>(0.00) | -0.00*<br>(0.00)   | 0.00<br>(0.00)     | -0.00*<br>(0.00)   | 0.00<br>(0.00)  |
| Centre                | -0.02***<br>(0.00) | -0.01*<br>(0.00)   | -0.02***<br>(0.00) | -0.01***<br>(0.00) | -0.00<br>(0.00) |
| Centre Est            | -0.01***<br>(0.00) | 0.00<br>(0.00)     | -0.01***<br>(0.00) | -0.01***<br>(0.00) | 0.00<br>(0.00)  |
| Centre Nord           | 0.00***<br>(0.00)  | -0.00<br>(0.00)    | -0.00<br>(0.00)    | 0.00<br>(0.00)     | -0.00<br>(0.00) |
| Centre Ouest          | -0.00*<br>(0.00)   | -0.00<br>(0.00)    | -0.00<br>(0.00)    | -0.00<br>(0.00)    | -0.00<br>(0.00) |
| Centre Sud            | -0.00<br>(0.00)    | 0.00<br>(0.00)     | -0.00<br>(0.00)    | -0.00***<br>(0.00) | 0.00<br>(0.00)  |
| Est                   | 0.03***<br>(0.00)  | 0.01*<br>(0.00)    | 0.00<br>(0.00)     | -0.01<br>(0.00)    | -0.00<br>(0.00) |
| Hauts Basins          | -0.01***<br>(0.00) | -0.01***<br>(0.00) | 0.00<br>(0.00)     | 0.00<br>(0.00)     | 0.00<br>(0.00)  |
| Nord                  | -0.00<br>(0.00)    | 0.00<br>(0.00)     | -0.00<br>(0.00)    | 0.00<br>(0.00)     | -0.00<br>(0.00) |
| Plateau Central       | -0.01***<br>(0.00) | -0.00<br>(0.00)    | -0.00<br>(0.00)    | -0.00*<br>(0.00)   | -0.00<br>(0.00) |
| Sahel                 | 0.03***<br>(0.00)  | 0.00<br>(0.00)     | -0.02***<br>(0.00) | -0.02**<br>(0.01)  | -0.00<br>(0.00) |
| Sud Ouest             | 0.01***<br>(0.00)  | 0.00<br>(0.00)     | 0.00<br>(0.00)     | -0.00<br>(0.00)    | -0.00<br>(0.00) |
| N                     | 9831               | 9838               | 9830               | 9832               | 9838            |

Standard errors in parentheses

=\*\* p<0.05

\*\* p<0.01

\*\*\* p<0.001"

Note: Standard errors are reported in parentheses below contribution estimates.

## Niger

|                              | Family planning exposure | Modern contraceptive | Antenatal          | FBD                | C-Section         |
|------------------------------|--------------------------|----------------------|--------------------|--------------------|-------------------|
| Obs. N                       | 7645                     | 7654                 | 7619               | 7652               | 7654              |
| N of obs G= <i>lw</i>        | 2629                     | 2632                 | 2626               | 2631               | 2632              |
| N of obs G= <i>hw</i>        | 5016                     | 5022                 | 4993               | 5021               | 5022              |
| Pr(low-wealth)               | 0.36                     | 0.10                 | 0.27               | 0.19               | 0.01              |
| Pr(high-wealth)              | 0.56                     | 0.18                 | 0.36               | 0.43               | 0.02              |
| Difference                   | -0.20                    | -0.08                | -0.09              | -0.25              | -0.01             |
| Total explained              | -0.10                    | -0.06                | -0.03              | -0.18              | -0.01             |
| % explained                  | 52%                      | 80%                  | 38%                | 73%                | 92%               |
| <i>Variable contribution</i> |                          |                      |                    |                    |                   |
|                              | Family planning exposure | Modern contraceptive | Antenatal          | FBD                | C-Section         |
| Age                          | 0.00**<br>(0.00)         | -0.00<br>(0.00)      | 0.00<br>(0.00)     | 0.00<br>(0.00)     | 0.00<br>(0.00)    |
| Children ever born           | -0.00<br>(0.00)          | 0.00<br>(0.00)       | -0.00*<br>(0.00)   | -0.01***<br>(0.00) | -0.00<br>(0.00)   |
| No education                 | -0.02***<br>(0.00)       | -0.02***<br>(0.00)   | -0.02***<br>(0.00) | -0.02***<br>(0.00) | -0.00*<br>(0.00)  |
| 1 <sup>0</sup> education     | 0.00*<br>(0.00)          | 0.00**<br>(0.00)     | 0.01***<br>(0.00)  | 0.00<br>(0.00)     | 0.00<br>(0.00)    |
| Rural                        | -0.03***<br>(0.00)       | -0.03***<br>(0.00)   | -0.01<br>(0.00)    | -0.07***<br>(0.00) | -0.00**<br>(0.00) |
| No partner                   | 0.00<br>(0.00)           | 0.00***<br>(0.00)    | -0.00<br>(0.00)    | -0.00<br>(0.00)    | -0.00<br>(0.00)   |
| No Complication information  | -0.01***<br>(0.00)       | -0.00<br>(0.00)      | -0.00<br>(0.00)    | -0.01***<br>(0.00) | -0.00<br>(0.00)   |
| Don't know                   | -0.00***<br>(0.00)       | 0.00<br>(0.00)       | -0.00<br>(0.00)    | -0.00<br>(0.00)    | 0.00<br>(0.00)    |
| Missing                      | -0.03***<br>(0.00)       | -0.01***<br>(0.00)   | 0.00<br>(.)        | -0.03***<br>(0.00) | -0.00<br>(0.00)   |
| Health facility permit       | -0.00**<br>(0.00)        | 0.00<br>(0.00)       | -0.00<br>(0.00)    | -0.00*<br>(0.00)   | -0.00<br>(0.00)   |
| Health facility money        | -0.00<br>(0.00)          | 0.00<br>(0.00)       | -0.00<br>(0.00)    | 0.00<br>(0.00)     | -0.00<br>(0.00)   |
| Health facility distance     | -0.01***<br>(0.00)       | -0.00<br>(0.00)      | -0.00*<br>(0.00)   | -0.01***<br>(0.00) | -0.00<br>(0.00)   |
| Health facility alone        | 0.00***<br>(0.00)        | -0.00<br>(0.00)      | 0.00<br>(0.00)     | -0.00<br>(0.00)    | -0.00<br>(0.00)   |
| Agadez                       | -0.00<br>(0.00)          | 0.00<br>(0.00)       | -0.00<br>(0.00)    | 0.00<br>(0.00)     | 0.00<br>(0.00)    |
| Diffa                        | 0.00***<br>(0.00)        | 0.00<br>(0.00)       | 0.00<br>(0.00)     | -0.00<br>(0.00)    | 0.00<br>(0.00)    |
| Dosso                        | 0.00*<br>(0.00)          | -0.00<br>(0.00)      | 0.00*<br>(0.00)    | 0.00<br>(0.00)     | 0.00<br>(0.00)    |
| Maradi                       | -0.00<br>(0.00)          | -0.00<br>(0.00)      | -0.00<br>(0.00)    | -0.00<br>(0.00)    | -0.00<br>(0.00)   |

|           |                    |                   |                  |                  |                 |
|-----------|--------------------|-------------------|------------------|------------------|-----------------|
| Tahoua    | -0.00<br>(0.00)    | -0.01**<br>(0.00) | -0.00<br>(0.00)  | -0.00<br>(0.00)  | -0.00<br>(0.00) |
| Tillaberi | -0.01***<br>(0.00) | -0.00<br>(0.00)   | 0.00**<br>(0.00) | 0.00<br>(0.00)   | -0.00<br>(0.00) |
| Zinder    | -0.00<br>(0.00)    | -0.00<br>(0.00)   | 0.00<br>(0.00)   | -0.01*<br>(0.00) | -0.00<br>(0.00) |

---

Standard errors in parentheses

\*\* p<0.05

\*\* p<0.01

\*\*\* p<0.001"

## Nigeria

|                              | Family planning exposure | Modern contraceptive | Antenatal          | FBD                | C-Section          |
|------------------------------|--------------------------|----------------------|--------------------|--------------------|--------------------|
| Obs. N                       | 19911                    | 19959                | 19427              | 19919              | 19959              |
| N of obs G= <i>lw</i>        | 8859                     | 8873                 | 8744               | 8853               | 8873               |
| N of obs G= <i>hw</i>        | 11052                    | 11086                | 10683              | 11066              | 11086              |
| Pr(low-wealth)               | 0.13                     | 0.03                 | 0.27               | 0.12               | 0.01               |
| Pr(high-wealth)              | 0.50                     | 0.17                 | 0.75               | 0.59               | 0.04               |
| Difference                   | -0.37                    | -0.14                | -0.48              | -0.46              | -0.03              |
| Total explained              | -0.26                    | -0.12                | -0.16              | -0.42              | -0.03              |
| % explained                  | 71%                      | 85%                  | 33%                | 90%                | 101%               |
| <i>Variable contribution</i> |                          |                      |                    |                    |                    |
|                              | Family planning exposure | Modern contraceptive | Antenatal          | FBD                | C-Section          |
| Age                          | -0.00*<br>(0.00)         | 0.00<br>(0.00)       | -0.00**<br>(0.00)  | -0.01***<br>(0.00) | -0.00<br>(0.00)    |
| Children ever born           | -0.00<br>(0.00)          | 0.01***<br>(0.00)    | -0.01***<br>(0.00) | -0.02***<br>(0.00) | -0.00**<br>(0.00)  |
| No education                 | -0.12***<br>(0.01)       | -0.05***<br>(0.00)   | -0.04***<br>(0.01) | -0.08***<br>(0.01) | -0.01***<br>(0.00) |
| 1 <sup>0</sup> education     | 0.01***<br>(0.00)        | 0.00<br>(0.00)       | 0.01***<br>(0.00)  | 0.01***<br>(0.00)  | -0.00<br>(0.00)    |
| Rural                        | -0.05***<br>(0.00)       | -0.01***<br>(0.00)   | -0.01*<br>(0.00)   | -0.04***<br>(0.00) | -0.00***<br>(0.00) |
| Islam                        | 0.02***<br>(0.00)        | -0.02***<br>(0.00)   | 0.00<br>(0.00)     | -0.03***<br>(0.00) | -0.00**<br>(0.00)  |
| Traditional / Other          | -0.00<br>(0.00)          | -0.00*<br>(0.00)     | 0.00<br>(0.00)     | -0.00<br>(0.00)    | 0.00<br>(0.00)     |
| No partner                   | 0.00*<br>(0.00)          | -0.00<br>(0.00)      | 0.00<br>(0.00)     | 0.00**<br>(0.00)   | 0.00<br>(0.00)     |
| No Complication information  | 0.00***<br>(0.00)        | -0.00<br>(0.00)      | 0.00***<br>(0.00)  | -0.00<br>(0.00)    | -0.00*<br>(0.00)   |
| Don't know                   | -0.00**<br>(0.00)        | -0.00*<br>(0.00)     | 0.00<br>(0.00)     | -0.00**<br>(0.00)  | 0.00<br>(0.00)     |
| Missing                      | -0.08***<br>(0.00)       | -0.02***<br>(0.00)   | 0.00<br>(.)        | -0.13***<br>(0.00) | -0.01***<br>(0.00) |
| Health facility permit       | -0.00<br>(0.00)          | -0.00**<br>(0.00)    | -0.00<br>(0.00)    | -0.00<br>(0.00)    | 0.00<br>(0.00)     |
| Health facility money        | -0.00***<br>(0.00)       | 0.00<br>(0.00)       | -0.00**<br>(0.00)  | -0.00***<br>(0.00) | -0.00*<br>(0.00)   |
| Health facility distance     | -0.00<br>(0.00)          | -0.00<br>(0.00)      | -0.02***<br>(0.00) | -0.01***<br>(0.00) | -0.00<br>(0.00)    |
| Health facility alone        | 0.00<br>(0.00)           | -0.00<br>(0.00)      | 0.00<br>(0.00)     | -0.00<br>(0.00)    | -0.00<br>(0.00)    |
| Health facility attitude     | 0.01***<br>(0.00)        | 0.00<br>(0.00)       | 0.00<br>(0.00)     | 0.00**<br>(0.00)   | 0.00<br>(0.00)     |

|               |                    |                    |                    |                    |                 |
|---------------|--------------------|--------------------|--------------------|--------------------|-----------------|
| North Central | 0.02***<br>(0.00)  | 0.00<br>(0.00)     | 0.03***<br>(0.00)  | 0.00<br>(0.00)     | -0.00<br>(0.00) |
| North East    | -0.03***<br>(0.00) | -0.01***<br>(0.00) | -0.04***<br>(0.00) | -0.03***<br>(0.00) | 0.00<br>(0.00)  |
| North West    | -0.04***<br>(0.00) | -0.02***<br>(0.00) | -0.07***<br>(0.01) | -0.06***<br>(0.00) | -0.00<br>(0.00) |
| South East    | 0.01***<br>(0.00)  | 0.00***<br>(0.00)  | 0.01*<br>(0.00)    | -0.00***<br>(0.00) | -0.00<br>(0.00) |
| South South   | 0.02***<br>(0.00)  | 0.00***<br>(0.00)  | 0.02***<br>(0.00)  | 0.01***<br>(0.00)  | -0.00<br>(0.00) |

---

Standard errors in parentheses

\* p<0.05

\*\* p<0.01

\*\*\* p<0.001"

## Ghana

|                       | Family planning exposure | Modern contraceptive | Antenatal  | FBD        | C-Section  |
|-----------------------|--------------------------|----------------------|------------|------------|------------|
| Obs. N                | 4.147                    | 4.147                | 4.127      | 4.146      | 4.147      |
| N of obs G= <i>lw</i> | 2125                     | 2125                 | 2111       | 2125       | 2125       |
| N of obs G= <i>hw</i> | 2022                     | 2022                 | 2016       | 2021       | 2022       |
| Pr(low-wealth)        | 0.5219482                | 0.2531611            | 0.8403013  | 0.5746376  | 0.062175   |
| Pr(high-wealth)       | 0.7805742                | 0.2575787            | 0.9422785  | 0.8988781  | 0.1909415  |
| Difference            | -0.258626                | -0.0044176           | -0.1019772 | -0.3242406 | -0.1287665 |
| Total explained       | -0.1324507               | 0.0692372            | -0.0932167 | -0.2083955 | -0.0994106 |
| % explained           | 51%                      | -1567%               | 91%        | 64%        | 77%        |

### Variable contribution

|                             | Family planning exposure | Modern contraceptive | Antenatal        | FBD                | C-Section          |
|-----------------------------|--------------------------|----------------------|------------------|--------------------|--------------------|
| Age                         | 0.00<br>(0.00)           | -0.00<br>(0.00)      | 0.01<br>(0.01)   | 0.01*<br>(0.00)    | 0.00<br>(0.01)     |
| Children ever born          | -0.01<br>(0.01)          | 0.05***<br>(0.01)    | -0.02*<br>(0.01) | -0.06***<br>(0.01) | -0.06***<br>(0.01) |
| No education                | -0.05***<br>(0.01)       | -0.02<br>(0.01)      | -0.03*<br>(0.01) | -0.03**<br>(0.01)  | -0.01<br>(0.01)    |
| 1 <sup>0</sup> education    | -0.01**<br>(0.00)        | -0.00<br>(0.00)      | -0.00<br>(0.00)  | -0.00<br>(0.00)    | -0.00<br>(0.00)    |
| Rural                       | 0.02<br>(0.01)           | 0.01<br>(0.01)       | -0.01<br>(0.01)  | -0.07***<br>(0.01) | -0.01<br>(0.01)    |
| Islam                       | 0.00<br>(0.00)           | -0.00<br>(0.00)      | 0.00<br>(0.00)   | 0.00<br>(0.00)     | 0.00<br>(0.00)     |
| Traditional / Other         | 0.01<br>(0.00)           | 0.00<br>(0.01)       | -0.00<br>(0.00)  | 0.00<br>(0.01)     | 0.01<br>(0.00)     |
| No partner                  | 0.00<br>(0.00)           | -0.00<br>(0.00)      | 0.00<br>(0.00)   | 0.00<br>(0.00)     | -0.00<br>(0.00)    |
| No Complication information | -0.01*<br>(0.00)         | -0.00<br>(0.00)      | -0.00*<br>(0.00) | -0.00*<br>(0.00)   | -0.00*<br>(0.00)   |
| Health facility permit      | 0.00<br>(0.00)           | 0.00<br>(0.00)       | 0.00<br>(0.00)   | -0.00<br>(0.00)    | -0.00<br>(0.00)    |
| Health facility money       | -0.01*<br>(0.00)         | -0.00<br>(0.01)      | -0.01<br>(0.00)  | 0.00<br>(0.01)     | -0.00<br>(0.00)    |
| Health facility distance    | -0.00<br>(0.01)          | -0.01<br>(0.01)      | -0.00<br>(0.01)  | -0.00<br>(0.01)    | 0.01<br>(0.00)     |
| Health facility alone       | -0.00<br>(0.00)          | 0.00<br>(0.00)       | -0.01<br>(0.00)  | -0.01<br>(0.00)    | 0.00<br>(0.00)     |
| No insurance                | -0.00<br>(0.00)          | 0.00<br>(0.00)       | -0.00<br>(0.00)  | -0.00<br>(0.00)    | -0.00<br>(0.00)    |
| Western                     | -0.01***<br>(0.00)       | -0.00*<br>(0.00)     | 0.00<br>(0.00)   | 0.01*<br>(0.00)    | 0.00<br>(0.00)     |

|               |                    |                    |                  |                   |                   |
|---------------|--------------------|--------------------|------------------|-------------------|-------------------|
| Central       | -0.01***<br>(0.00) | -0.00***<br>(0.00) | 0.01<br>(0.00)   | 0.01**<br>(0.00)  | -0.00<br>(0.00)   |
| Volta         | 0.00<br>(0.00)     | 0.00*<br>(0.00)    | -0.00<br>(0.00)  | -0.00<br>(0.00)   | -0.00**<br>(0.00) |
| Eastern       | -0.00<br>(0.00)    | 0.00<br>(0.00)     | -0.00<br>(0.00)  | 0.00<br>(0.00)    | -0.00<br>(0.00)   |
| Greater Accra | -0.02***<br>(0.01) | -0.01<br>(0.01)    | 0.03**<br>(0.01) | -0.00<br>(0.01)   | 0.01<br>(0.00)    |
| Brong Ahafo   | -0.01***<br>(0.00) | 0.01**<br>(0.00)   | -0.00<br>(0.00)  | 0.00<br>(0.00)    | -0.00*<br>(0.00)  |
| Northern      | -0.01<br>(0.02)    | 0.00<br>(0.01)     | -0.05*<br>(0.02) | -0.06**<br>(0.02) | -0.02*<br>(0.01)  |
| Upper East    | -0.02**<br>(0.01)  | 0.02**<br>(0.01)   | -0.00<br>(0.01)  | 0.00<br>(0.01)    | -0.01<br>(0.00)   |
| Upper West    | 0.01<br>(0.00)     | 0.01<br>(0.01)     | -0.00<br>(0.00)  | 0.00<br>(0.00)    | -0.00<br>(0.00)   |
| N             | 4147               | 4147               | 4127             | 4146              | 4147              |

Standard errors in parentheses

=\*\* p<0.05

\*\* p<0.01

\*\*\* p<0.001"

Note: Standard errors are reported in parantheses below contribution estimates.



## Senegal

|                       | Family planning exposure | Modern contraceptive | Antenatal  | FBD        | C-Section  |
|-----------------------|--------------------------|----------------------|------------|------------|------------|
| Obs. N                | 8.839                    | 8.839                | 8.690      | 8.839      | 8.750      |
| N of obs G= <i>w</i>  | 4932                     | 4932                 | 4872       | 4932       | 4877       |
| N of obs G= <i>hw</i> | 3907                     | 3907                 | 3818       | 3907       | 3873       |
| Pr(low-wealth)        | 0.3326594                | 0.1753225            | 0.4047448  | 0.6155451  | 0.0328351  |
| Pr(high-wealth)       | 0.6070043                | 0.3396693            | 0.6257858  | 0.9276707  | 0.0855921  |
| Difference            | -0.274345                | -0.1643468           | -0.2210409 | -0.3121256 | -0.052757  |
| Total explained       | -0.0927315               | -0.0865574           | -0.1016396 | -0.1004877 | -0.0386613 |
| % explained           | 34%                      | 53%                  | 46%        | 32%        | 73%        |

### Variable contribution

|                            | Family planning exposure | Modern contraceptive | Antenatal          | FBD                | C-Section          |
|----------------------------|--------------------------|----------------------|--------------------|--------------------|--------------------|
| Age                        | -0.00*<br>(0.00)         | 0.00<br>(0.00)       | -0.01***<br>(0.00) | -0.00<br>(0.00)    | -0.01*<br>(0.00)   |
| Children ever born         | -0.00<br>(0.00)          | 0.03***<br>(0.00)    | -0.04***<br>(0.00) | -0.02***<br>(0.01) | -0.01***<br>(0.00) |
| No education               | -0.05***<br>(0.01)       | -0.04***<br>(0.01)   | -0.04***<br>(0.01) | -0.02***<br>(0.00) | -0.01**<br>(0.00)  |
| 1 <sup>o</sup> education   | 0.01**<br>(0.00)         | 0.00<br>(0.00)       | 0.01***<br>(0.00)  | 0.00<br>(0.00)     | 0.00*<br>(0.00)    |
| Rural                      | -0.01<br>(0.01)          | -0.05***<br>(0.01)   | -0.03**<br>(0.01)  | -0.03***<br>(0.01) | -0.01<br>(0.01)    |
| Islam                      | 0.00<br>(0.00)           | 0.00*<br>(0.00)      | 0.00<br>(0.00)     | 0.00<br>(0.00)     | 0.00<br>(0.00)     |
| Animist                    | -0.00**<br>(0.00)        | 0.00<br>(0.00)       | -0.00<br>(0.00)    | -0.00*<br>(0.00)   | 0.00<br>(0.00)     |
| No partner                 | 0.00**<br>(0.00)         | 0.00***<br>(0.00)    | 0.00***<br>(0.00)  | -0.00<br>(0.00)    | -0.00*<br>(0.00)   |
| No Complication infomation | 0.00**<br>(0.00)         | 0.00<br>(0.00)       | 0.01***<br>(0.00)  | 0.00<br>(0.00)     | 0.00**<br>(0.00)   |
| Ziguinchor                 | 0.00<br>(0.00)           | -0.00<br>(0.00)      | 0.00<br>(0.00)     | -0.00<br>(0.00)    | -0.00<br>(0.00)    |
| Diourbel                   | 0.01***<br>(0.00)        | 0.01***<br>(0.00)    | 0.00*<br>(0.00)    | -0.00<br>(0.00)    | -0.00<br>(0.00)    |
| SaintLouis                 | -0.00**<br>(0.00)        | 0.00<br>(0.00)       | -0.00<br>(0.00)    | -0.00<br>(0.00)    | 0.00<br>(0.00)     |
| Tambacounda                | -0.01<br>(0.00)          | -0.01*<br>(0.00)     | 0.00<br>(0.00)     | -0.01*<br>(0.00)   | -0.00<br>(0.00)    |
| Kaolack                    | -0.00<br>(0.00)          | -0.00*<br>(0.00)     | 0.00<br>(0.00)     | -0.00<br>(0.00)    | -0.00**<br>(0.00)  |
| This                       | 0.00<br>(0.00)           | 0.00<br>(0.00)       | 0.00<br>(0.00)     | -0.00*<br>(0.00)   | 0.00*<br>(0.00)    |

|          |                    |                    |                  |                   |                 |
|----------|--------------------|--------------------|------------------|-------------------|-----------------|
| Louga    | -0.01***<br>(0.00) | -0.00<br>(0.00)    | -0.00*<br>(0.00) | 0.00<br>(0.00)    | 0.00<br>(0.00)  |
| Fatick   | -0.01**<br>(0.00)  | -0.00<br>(0.00)    | -0.00<br>(0.00)  | -0.00<br>(0.00)   | -0.00<br>(0.00) |
| Kolda    | -0.02**<br>(0.01)  | -0.01***<br>(0.00) | -0.01<br>(0.01)  | -0.02**<br>(0.01) | -0.00<br>(0.00) |
| Matam    | -0.01***<br>(0.00) | -0.00***<br>(0.00) | -0.00<br>(0.00)  | 0.00<br>(0.00)    | -0.00<br>(0.00) |
| Kaffrine | -0.00<br>(0.01)    | -0.01*<br>(0.00)   | 0.00<br>(0.01)   | -0.00<br>(0.01)   | -0.00<br>(0.00) |
| Kedougou | -0.00<br>(0.00)    | -0.00<br>(0.00)    | 0.00<br>(0.00)   | -0.00<br>(0.00)   | 0.00<br>(0.00)  |
| Sedhiou  | -0.01*<br>(0.00)   | -0.01**<br>(0.00)  | -0.00<br>(0.00)  | -0.01*<br>(0.00)  | -0.00<br>(0.00) |
| N        | 8839               | 8839               | 8690             | 8839              | 8750            |

Standard errors in parentheses

=\*\* p<0.05

\*\* p<0.01

\*\*\* p<0.001"

Note: Standard errors are reported in parantheses below contribution estimates.

Supplementary Table 3: Summary of regional covariates included in the analysis

| Country / Region           | low-wealth |      | higher wealth |      |
|----------------------------|------------|------|---------------|------|
|                            | mean       | sd   | mean          | sd   |
| <b><u>Burkina Faso</u></b> |            |      |               |      |
| Boucle-n                   | 0.07       | 0.26 | 0.12          | 0.33 |
| Cascades                   | 0.01       | 0.10 | 0.05          | 0.21 |
| Centre                     | 0.01       | 0.11 | 0.12          | 0.32 |
| Centre Est                 | 0.05       | 0.22 | 0.09          | 0.28 |
| Centre Nord                | 0.08       | 0.27 | 0.08          | 0.27 |
| Centre Ouest               | 0.08       | 0.27 | 0.08          | 0.27 |
| Centre Sud                 | 0.04       | 0.20 | 0.05          | 0.22 |
| Est                        | 0.22       | 0.41 | 0.08          | 0.27 |
| Hauts Basins               | 0.06       | 0.23 | 0.12          | 0.33 |
| Nord                       | 0.06       | 0.23 | 0.08          | 0.27 |
| Plateau Central            | 0.03       | 0.16 | 0.05          | 0.22 |
| Sahel                      | 0.20       | 0.40 | 0.06          | 0.23 |
| Sud Ouest                  | 0.09       | 0.29 | 0.03          | 0.17 |
| <b><u>Niger</u></b>        |            |      |               |      |
| Agadez                     | 0.02       | 0.14 | 0.01          | 0.12 |
| Diffa                      | 0.02       | 0.14 | 0.03          | 0.17 |
| Dosso                      | 0.09       | 0.29 | 0.13          | 0.34 |
| Maradi                     | 0.21       | 0.41 | 0.22          | 0.41 |
| Tahoua                     | 0.28       | 0.45 | 0.20          | 0.40 |
| Tillaberi                  | 0.12       | 0.32 | 0.13          | 0.34 |
| Zinder                     | 0.25       | 0.44 | 0.19          | 0.40 |
| Niamey                     | 0.00       | 0.00 | 0.07          | 0.26 |
| <b><u>Nigeria</u></b>      |            |      |               |      |
| North Central              | 0.07       | 0.26 | 0.16          | 0.37 |
| North East                 | 0.30       | 0.46 | 0.13          | 0.34 |
| North West                 | 0.60       | 0.49 | 0.29          | 0.46 |
| South East                 | 0.02       | 0.15 | 0.10          | 0.30 |
| South South                | 0.00       | 0.05 | 0.13          | 0.33 |
| South West                 | 0.01       | 0.11 | 0.19          | 0.39 |
| <b><u>Ghana</u></b>        |            |      |               |      |
| Western                    | 0.03       | 0.16 | 0.12          | 0.33 |
| Central                    | 0.02       | 0.13 | 0.13          | 0.34 |
| Volta                      | 0.02       | 0.12 | 0.20          | 0.40 |
| Eastern                    | 0.08       | 0.27 | 0.07          | 0.26 |
| Greater Accra              | 0.06       | 0.24 | 0.10          | 0.30 |
| Ashanti                    | 0.05       | 0.21 | 0.21          | 0.41 |
| Brong Ahafo                | 0.10       | 0.31 | 0.09          | 0.28 |
| Northern                   | 0.41       | 0.49 | 0.04          | 0.19 |
| Upper East                 | 0.16       | 0.36 | 0.01          | 0.11 |
| Upper West                 | 0.08       | 0.27 | 0.01          | 0.11 |
| <b><u>Senegal</u></b>      |            |      |               |      |
| Dakar                      | 0.00       | 0.00 | 0.26          | 0.44 |
| Ziguinchor                 | 0.01       | 0.10 | 0.04          | 0.19 |

|             |      |      |      |      |
|-------------|------|------|------|------|
| Diourbel    | 0.07 | 0.25 | 0.15 | 0.36 |
| SaintLouis  | 0.06 | 0.24 | 0.06 | 0.24 |
| Tambacounda | 0.15 | 0.35 | 0.03 | 0.16 |
| Kaolack     | 0.11 | 0.31 | 0.08 | 0.27 |
| This        | 0.03 | 0.17 | 0.15 | 0.36 |
| Louga       | 0.11 | 0.31 | 0.07 | 0.25 |
| Fatick      | 0.07 | 0.25 | 0.05 | 0.21 |
| Kolda       | 0.15 | 0.36 | 0.03 | 0.17 |
| Matam       | 0.04 | 0.19 | 0.04 | 0.19 |
| Kaffrine    | 0.14 | 0.35 | 0.02 | 0.15 |
| Kedougou    | 0.02 | 0.14 | 0.01 | 0.10 |
| Sedhiou     | 0.05 | 0.22 | 0.03 | 0.16 |

### Supplementary B: Fairlie decomposition detailed

The average difference in use of a reproductive health care service between the wealth groups can be expressed as:

$$\bar{Y}^{lw} - \bar{Y}^{hw} = \left[ \sum_{i=1}^{N^{lw}} \frac{F(X_i^{lw} \hat{\beta}^{lw})}{N^{lw}} - \sum_{i=1}^{N^{hw}} \frac{F(X_i^{hw} \hat{\beta}^{lw})}{N^{hw}} \right] + \left[ \sum_{i=1}^{N^{hw}} \frac{F(X_i^{hw} \hat{\beta}^{lw})}{N^{hw}} - \sum_{i=1}^{N^{hw}} \frac{F(X_i^{hw} \hat{\beta}^{hw})}{N^{hw}} \right] \quad (1)$$

where  $\bar{Y}$  is the average probability of use of a reproductive health care service by a group (a dummy variable which, depending on the analysis, includes whether a woman had at least one family planning information source, used modern contraceptives, 4+ antenatal care visits, facility-based childbirth, C-section respectively),  $lw$  indicates the low-wealth group and  $hw$  indicates the high-wealth group.  $X_i$  is the vector of independent variables of respondent  $i$  in a given group (low-wealth or high-wealth group),  $\hat{\beta}$  is the vector of coefficients estimated separately for each of the two groups using the pooled sample,  $N$  is the number of observations in a given group, and  $F$  is the cumulative logistic distribution function.

The first term on the right-hand side of equation (1) measures the proportion of the wealth gap in the use of a selected reproductive health care service that is due to differences in the distribution of characteristics of the two groups. This is the variation explained by differences in observable characteristics. This represents the extent to which the wealth gap in reproductive health care services would reduce if the low-wealth group had the same characteristics as the high-wealth group. The second term captures the degree to which women in the low-wealth and high-wealth groups, with similar observable characteristics, have different propensities in use. This indicates the portion of the gap that is due to differences in the impact of observable characteristics between the low- and high-wealth groups. This is the portion of the gap that may be due to wealth discrimination, differences in the availability of health care services, differences in attitudes between wealth groups, or other unmeasured characteristics (Fairlie, 2006).
